# Supplementary material
Source: publisher figshare collection journal article supplement (https://acs.figshare.com/ndownloader/files/4313767)

# Supporting Information

## Copper-Catalyzed Annulative Amination of *ortho*-Alkynylphenols with Hydroxylamines: Synthesis of 3-Aminobenzofurans by Umpolung Amination Strategy

Koji Hirano,\* Tetsuya Satoh, and Masahiro Miura\*

*Department of Applied Chemistry, Faculty of Engineering, Osaka University, Suita, Osaka 565-0871,  
Japan*

### Contents

|                                    |        |
|------------------------------------|--------|
| Instrumentation and Chemicals      | S1–S2  |
| Experimental Procedure             | S3     |
| Characterization Data for Products | S4–S44 |

### Instrumentation and Chemicals

<sup>1</sup>H, <sup>13</sup>C, and <sup>19</sup>F NMR spectra were recorded at 400 or 600 MHz, 100 or 150 MHz, and 373 MHz, respectively, for CDCl<sub>3</sub> solutions. MS data were obtained by EI. GC analysis was carried out using a silicon OV-17 column (i. d. 2.6 mm x 1.5 m) or a CBP-1 capillary column (i. d. 0.5 mm x 25 m). TLC analyses were performed on commercial glass plates bearing a 0.25-mm layer of Merck Silica gel 60F<sub>254</sub>. Silica gel 60 N (spherical neutral, obtained from Kanto Chemical) was used for column chromatography.

Unless otherwise noted, materials obtained from commercial suppliers were used without further purification. NMP was freshly distilled from CaH<sub>2</sub> and stored over MS4A strictly under nitrogen. Cu(OTf)<sub>2</sub> was purchased from TCI. LiO-*t*-Bu and Grubbs 2<sup>nd</sup> generation catalyst were obtained from Aldrich. *ortho*-Alkynylphenols **1** were prepared according to the literature.<sup>1</sup> *O*-Benzoyl-*N,N*-diethylhydroxylamine (**2a**) was obtained by the reaction of *N,N*-diethylhydroxylamine with benzoyl chloride, while other hydroxylamines **2b–l** were synthesized through the nucleophilic substitution of the corresponding amines with benzoyl peroxide.<sup>2</sup> Unless otherwise noted, all reactions were carried out under nitrogen atmosphere.

---

<sup>1</sup> Yoneda, E.; Sugioka, T.; Hirao, K.; Zhang, S. W.; Takahashi, S. *J. Chem. Soc., Perkin Trans. 1* **1998**, 3, 477.

<sup>2</sup> (a) Berman, A. M.; Johnson, J. S. *J. Am. Chem. Soc.* **2004**, *126*, 5680. (b) Berman, A. M.; Johnson, J. S. *J. Org. Chem.* **2006**, *71*, 219.

## Experimental Procedure

**Synthesis of 3aa (Table 1, entry 14):** Cu(OTf)<sub>2</sub> (18 mg, 0.050 mmol) and LiO-*t*-Bu (80 mg, 1.0 mmol) were placed in a 20 mL two-necked reaction flask, which is filled with nitrogen using the standard Schlenk technique. NMP (1.0 mL) was added, and the suspension was stirred for 10 min at room temperature. A solution of 2-(phenylethynyl)phenol (**1a**, 97.1 mg, 0.50 mmol) and *O*-benzoyl-*N,N*-diethylhydroxylamine (**2a**, 116 mg, 0.60 mmol) in NMP (2.0 mL) was then added dropwise. After being stirred for 4 h at the same temperature, the resulting mixture was poured into saturated aq. NaCl and extracted with dichloromethane. The combined organic layer was dried over sodium sulfate and concentrated in vacuo. Subsequent silica gel column purification with hexane/Et<sub>3</sub>N (200/1, v/v) afforded *N,N*-diethyl-2-phenylbenzofuran-3-amine (**3aa**, 81 mg, 0.31 mmol) in 61% yield. The optimization studies for chromatographic purification were summarized below (The yields based on GC method for all trials were >90%).

| conditions                   | acidic silica gel with Hex | neutral silica gel with Hex | neutral silica gel with Hex/Et <sub>3</sub> N (200/1) |
|------------------------------|----------------------------|-----------------------------|-------------------------------------------------------|
| isolated yield of <b>3aa</b> | 23%                        | 52%                         | 61%                                                   |

**Synthesis of 4 (Scheme 2):** With Cu(OTf)<sub>2</sub> (36 mg, 0.10 mmol), under the otherwise identical conditions mentioned above, the oxyamination of 2-(3-methylbut-3-en-1-yn-1-yl)phenol (**1l**, 79 mg, 0.50 mmol) with *N*-allyl-*O*-benzoyl-*N*-methylhydroxylamine (**2g**, 191.2 mg, 1.0 mmol) proceeded to furnish *N*-allyl-*N*-methyl-2-(1-propen-2-yl)benzofuran-3-amine (**3lg**, 58 mg, 0.26 mmol) in 51% yield.

Grubbs 2<sup>nd</sup> generation catalyst (3.7 mg, 4.4 μmol) was placed in a 5 mL Schlenk tube, which is then filled with nitrogen. Trimethyl(vinyloxy)silane (0.013 mL, 0.087 mmol) and a solution of **3lg** (20 mg, 0.087 mmol) in toluene (1.0 mL) were subsequently added dropwise. The solution was heated at 110 °C for 2 h. The resulting mixture was allowed to cool to room temperature and filtered through a pad of neutral alumina. Concentration under reduced pressure followed by column chromatography on silica gel with hexane/EtOAc/Et<sub>3</sub>N (400/20/2.5, v/v/v) produced 1,3,5-trimethyl-2,3-dihydro-1*H*-benzofuro[3,2-*b*]azepine (**4**, 15 mg, 0.067 mmol) in 77% yield.

## Characterization Data for Products

$^1\text{H}$  and  $^{13}\text{C}$  NMR spectra for all compounds are attached in the last part.

***N,N*-Diethyl-2-phenylbenzofuran-3-amine (3aa)**; oil;  $^1\text{H}$  NMR (400 MHz,  $\text{CDCl}_3$ )  $\delta$  1.05 (t,  $J = 7.4$  Hz, 6H), 3.26 (q,  $J = 7.4$  Hz, 4H), 7.16 (t,  $J = 7.3$  Hz, 1H), 7.26–7.31 (m, 2H), 7.40–7.49 (m, 3H), 7.66 (d,  $J = 7.8$  Hz, 1H), 8.40 (d,  $J = 7.8$  Hz, 2H);  $^{13}\text{C}$  NMR (100 MHz,  $\text{CDCl}_3$ )  $\delta$  13.66, 48.77, 111.73, 120.97, 122.01, 124.02, 125.91, 127.09, 127.73, 127.94, 128.19, 131.12, 149.16, 153.26; HRMS  $m/z$  ( $\text{M}^+$ ) calcd for  $\text{C}_{18}\text{H}_{19}\text{NO}$ : 265.1467, found: 265.1466.

***N,N*-Diethyl-2-(4-methoxyphenyl)benzofuran-3-amine (3ba)**; oil;  $^1\text{H}$  NMR (400 MHz,  $\text{CDCl}_3$ )  $\delta$  1.04 (t,  $J = 7.4$  Hz, 6H), 3.24 (q,  $J = 7.4$  Hz, 4H), 3.85 (s, 3H), 6.95 (dt,  $J = 8.7, 1.8$  Hz, 2H), 7.14 (t,  $J = 7.3$  Hz, 1H), 7.21 (t,  $J = 8.2$  Hz, 1H), 7.45 (d,  $J = 7.8$  Hz, 1H), 7.64 (d,  $J = 7.8$  Hz, 1H), 8.34 (dt,  $J = 8.7, 2.3$  Hz, 2H);  $^{13}\text{C}$  NMR (100 MHz,  $\text{CDCl}_3$ )  $\delta$  13.68, 48.80, 55.23, 111.53, 113.61, 120.65, 121.90, 123.50, 124.00, 125.26, 127.44, 128.03, 149.52, 153.07, 159.21; HRMS  $m/z$  ( $\text{M}^+$ ) calcd for  $\text{C}_{19}\text{H}_{21}\text{NO}_2$ : 295.1572, found: 295.1571.

***N,N*-Diethyl-2-((4-trifluoromethyl)phenyl)benzofuran-3-amine (3ca)**; oil;  $^1\text{H}$  NMR (400 MHz,  $\text{CDCl}_3$ )  $\delta$  1.05 (t,  $J = 7.3$  Hz, 6H), 3.27 (q,  $J = 7.3$  Hz, 4H), 7.19 (t,  $J = 7.8$  Hz, 1H), 7.28–7.32 (m, 1H), 7.50 (d,  $J = 8.2$  Hz, 1H), 7.66 (d,  $J = 8.2$  Hz, 2H), 7.70 (d,  $J = 7.8$  Hz, 1H), 8.52 (d,  $J = 8.2$  Hz, 2H);  $^{13}\text{C}$  NMR (100 MHz,  $\text{CDCl}_3$ )  $\delta$  13.60, 48.84, 111.96, 121.32, 122.35, 124.24 (q,  $J = 270.8$  Hz), 124.86, 125.14 (q,  $J = 3.8$  Hz), 125.78, 127.59, 129.09 (q,  $J = 32.4$  Hz), 129.21, 134.36, 147.59, 153.53;  $^{19}\text{F}$  NMR (373 MHz,  $\text{CDCl}_3$ )  $\delta$  -62.47; HRMS  $m/z$  ( $\text{M}^+$ ) calcd for  $\text{C}_{19}\text{H}_{18}\text{F}_3\text{NO}$ : 333.1340, found: 333.1338.

**2-(4-Chlorophenyl)-*N,N*-diethylbenzofuran-3-amine (3da)**; oil;  $^1\text{H}$  NMR (400 MHz,  $\text{CDCl}_3$ )  $\delta$  1.04 (t,  $J = 7.3$  Hz, 6H), 3.25 (q,  $J = 7.3$  Hz, 4H), 7.17 (t,  $J = 7.3$  Hz, 1H), 7.26 (t,  $J = 7.8$  Hz, 1H), 7.38 (dt,  $J = 8.8, 2.2$  Hz, 2H), 7.47 (d,  $J = 8.1$  Hz, 1H), 7.67 (d,  $J = 7.3$  Hz, 1H), 8.35 (dt,  $J = 8.8, 2.6$  Hz, 2H);  $^{13}\text{C}$  NMR (100 MHz,  $\text{CDCl}_3$ )  $\delta$  13.61, 48.82, 111.77, 121.03, 122.18, 124.31, 127.12, 127.50, 127.69, 128.40, 129.57, 133.31, 148.24, 153.27; HRMS  $m/z$  ( $\text{M}^+$ ) calcd for  $\text{C}_{18}\text{H}_{18}\text{ClNO}$ : 299.1077, found: 299.1070.

***N,N*-Diethyl-2-(3-thienyl)benzofuran-3-amine (3ea)**; oil;  $^1\text{H}$  NMR (400 MHz,  $\text{CDCl}_3$ )  $\delta$  1.04 (t,  $J =$

7.3 Hz, 6H), 3.24 (q,  $J = 7.3$  Hz, 4H), 7.15 (t,  $J = 7.3$  Hz, 1H), 7.21–7.25 (m, 1H), 7.34 (dd,  $J = 5.0, 3.2$  Hz, 1H), 7.45 (d,  $J = 7.8$  Hz, 1H), 7.64 (d,  $J = 7.8$  Hz, 1H), 7.99 (d,  $J = 5.0$  Hz, 1H), 8.05 (d,  $J = 3.2$  Hz, 1H);  $^{13}\text{C}$  NMR (100 MHz,  $\text{CDCl}_3$ )  $\delta$  13.75, 48.83, 111.66, 120.74, 122.06, 122.07, 123.78, 125.07, 125.35, 126.12, 127.53, 132.00, 147.92, 153.33; HRMS  $m/z$  ( $\text{M}^+$ ) calcd for  $\text{C}_{16}\text{H}_{17}\text{NOS}$ : 271.1031, found: 271.1032.

**2-(1-Cyclohexen-1-yl)-*N,N*-diethylbenzofuran-3-amine (3fa)**; oil;  $^1\text{H}$  NMR (400 MHz,  $\text{CDCl}_3$ )  $\delta$  1.01 (t,  $J = 7.3$  Hz, 6H), 1.59–1.69 (m, 2H), 1.71–1.77 (m, 2H), 2.24–2.27 (m, 2H), 2.64–2.66 (m, 2H), 3.15 (q,  $J = 7.3$  Hz, 4H), 6.67–6.70 (m, 1H), 7.09 (t,  $J = 8.0$  Hz, 1H), 7.17 (t,  $J = 8.4$  Hz, 1H), 7.36 (d,  $J = 8.4$  Hz, 1H), 7.58 (d,  $J = 8.0$  Hz, 1H);  $^{13}\text{C}$  NMR (100 MHz,  $\text{CDCl}_3$ )  $\delta$  13.79, 22.11, 22.65, 25.64, 25.71, 48.73, 111.29, 120.61, 121.56, 123.31, 125.15, 127.56, 128.01, 128.74, 151.57, 152.77; HRMS  $m/z$  ( $\text{M}^+$ ) calcd for  $\text{C}_{18}\text{H}_{23}\text{NO}$ : 269.1780, found: 269.1783.

**2-Butyl-*N,N*-diethylbenzofuran-3-amine (3ga)**; oil;  $^1\text{H}$  NMR (400 MHz,  $\text{CDCl}_3$ )  $\delta$  0.95 (t,  $J = 7.3$  Hz, 3H), 0.97 (t,  $J = 7.3$  Hz, 6H), 1.38–1.44 (m, 2H), 1.60–1.73 (m, 2H), 2.76 (t,  $J = 7.3$  Hz, 2H), 3.12 (q,  $J = 7.3$  Hz, 4H), 7.11 (td,  $J = 7.3, 1.4$  Hz, 1H), 7.17 (td,  $J = 7.3, 1.4$  Hz, 1H), 7.38 (d,  $J = 7.8$  Hz, 1H), 7.56 (d,  $J = 6.9$  Hz, 1H);  $^{13}\text{C}$  NMR (100 MHz,  $\text{CDCl}_3$ )  $\delta$  13.92, 14.06, 22.63, 25.42, 30.18, 49.28, 111.31, 119.92, 121.59, 122.69, 124.15, 126.80, 153.45, 155.78; HRMS  $m/z$  ( $\text{M}^+$ ) calcd for  $\text{C}_{16}\text{H}_{23}\text{NO}$ : 245.1780, found: 245.1782.

**2-Cyclohexyl-*N,N*-diethylbenzofuran-3-amine (3ha)**; oil;  $^1\text{H}$  NMR (400 MHz,  $\text{CDCl}_3$ )  $\delta$  0.96 (t,  $J = 7.3$  Hz, 6H), 1.26–1.44 (m, 4H), 1.65–1.85 (m, 6H), 3.01 (tt,  $J = 11.4, 3.6$  Hz, 1H), 3.12 (q,  $J = 7.3$  Hz, 4H), 7.10 (td,  $J = 7.3, 0.9$  Hz, 1H), 7.17 (td,  $J = 7.3, 1.3$  Hz, 1H), 7.38 (d,  $J = 8.0$  Hz, 1H), 7.56 (d,  $J = 7.8$  Hz, 1H);  $^{13}\text{C}$  NMR (100 MHz,  $\text{CDCl}_3$ )  $\delta$  14.14, 25.98, 26.35, 31.22, 34.89, 49.39, 111.41, 120.04, 121.50, 122.18, 122.64, 126.55, 153.41, 159.70; HRMS  $m/z$  ( $\text{M}^+$ ) calcd for  $\text{C}_{18}\text{H}_{25}\text{NO}$ : 271.1936, found: 271.1935.

**2-(*tert*-Butyl)-*N,N*-diethylbenzofuran-3-amine (3ia)**; oil;  $^1\text{H}$  NMR (400 MHz,  $\text{CDCl}_3$ )  $\delta$  1.04 (t,  $J = 7.3$  Hz, 6H), 1.44 (s, 9H), 3.12 (bs, 4H), 7.09 (t,  $J = 7.3$  Hz, 1H), 7.16 (t,  $J = 7.3$  Hz, 1H), 7.36 (d,  $J = 7.8$  Hz, 1H), 7.57 (d,  $J = 7.8$  Hz, 1H);  $^{13}\text{C}$  NMR (100 MHz,  $\text{CDCl}_3$ )  $\delta$  14.09, 29.59, 34.03, 48.90, 111.26, 120.79, 121.27, 122.74, 124.45, 127.62, 152.63, 160.06; HRMS  $m/z$  ( $\text{M}^+$ ) calcd for  $\text{C}_{16}\text{H}_{23}\text{NO}$ : 245.1780, found: 245.1782.

**2-Butyl-5,7-dichloro-*N,N*-diethylbenzofuran-3-amine (3ja)**; oil;  $^1\text{H}$  NMR (400 MHz,  $\text{CDCl}_3$ )  $\delta$  0.96 (t,  $J = 7.3$  Hz, 9H), 1.38–1.47 (m, 2H), 1.67–1.74 (m, 2H), 2.77 (t,  $J = 7.7$  Hz, 2H), 3.07 (q,  $J = 7.3$  Hz, 4H), 7.19 (d,  $J = 2.2$  Hz, 1H), 7.42 (d,  $J = 2.2$  Hz, 1H);  $^{13}\text{C}$  NMR (100 MHz,  $\text{CDCl}_3$ )  $\delta$  13.84, 13.94, 22.63, 25.58, 29.99, 49.06, 117.30, 118.05, 122.92, 124.75, 127.49, 129.48, 147.68, 158.56; HRMS  $m/z$  ( $\text{M}^+$ ) calcd for  $\text{C}_{16}\text{H}_{21}\text{Cl}_2\text{NO}$ : 313.1000, found: 313.1002.

**5,7-Di-*tert*-butyl-2-butyl-*N,N*-diethylbenzofuran-3-amine (3ka)**; oil;  $^1\text{H}$  NMR (400 MHz,  $\text{CDCl}_3$ )  $\delta$  0.94 (t,  $J = 7.3$  Hz, 3H), 0.99 (t,  $J = 7.3$  Hz, 6H), 1.37 (s, 9H), 1.40–1.44 (m, 2H), 1.50 (s, 9H), 1.66–1.70 (m, 2H), 2.76 (t,  $J = 7.3$  Hz, 2H), 3.13 (q,  $J = 7.3$  Hz, 4H), 7.15 (d,  $J = 1.8$  Hz, 1H), 7.39 (d,  $J = 1.8$  Hz, 1H);  $^{13}\text{C}$  NMR (100 MHz,  $\text{CDCl}_3$ )  $\delta$  13.94, 14.27, 22.46, 25.42, 29.95, 30.26, 31.96, 34.32, 34.71, 49.16, 113.88, 117.46, 124.10, 126.79, 133.45, 144.03, 149.81, 154.53; HRMS  $m/z$  ( $\text{M}^+$ ) calcd for  $\text{C}_{24}\text{H}_{39}\text{NO}$ : 357.3032, found: 357.3027.

***N,N*-Diallyl-2-butylbenzofuran-3-amine (3gb)**; oil;  $^1\text{H}$  NMR (400 MHz,  $\text{CDCl}_3$ )  $\delta$  0.95 (t,  $J = 7.3$  Hz, 3H), 1.29–1.43 (m, 2H), 1.64–1.72 (m, 2H), 2.76 (t,  $J = 7.3$  Hz, 2H), 3.69 (d,  $J = 6.6$  Hz, 4H), 5.00–5.03 (m, 2H), 5.07–5.13 (m, 2H), 5.83 (ddt,  $J = 16.5, 10.2, 6.2$  Hz, 2H), 7.12–7.18 (m, 2H), 7.34–7.36 (m, 1H), 7.55–7.57 (m, 1H);  $^{13}\text{C}$  NMR (100 MHz,  $\text{CDCl}_3$ )  $\delta$  13.88, 22.52, 25.65, 30.15, 57.33, 111.23, 116.80, 119.67, 121.75, 122.75, 126.10, 127.19, 135.96, 153.18, 154.34; HRMS  $m/z$  ( $\text{M}^+$ ) calcd for  $\text{C}_{18}\text{H}_{23}\text{NO}$ : 269.1780, found: 269.1781.

***N*-Benzyl-2-butyl-*N*-methylbenzofuran-3-amine (3gc)**; oil;  $^1\text{H}$  NMR (400 MHz,  $\text{CDCl}_3$ )  $\delta$  0.91 (t,  $J = 7.3$  Hz, 3H), 1.26–1.38 (m, 2H), 1.51–1.59 (m, 2H), 2.68 (t,  $J = 7.7$  Hz, 2H), 2.83 (s, 3H), 4.21 (s, 2H), 7.14–7.37 (m, 8H), 7.62–7.64 (m, 1H);  $^{13}\text{C}$  NMR (100 MHz,  $\text{CDCl}_3$ )  $\delta$  13.82, 22.48, 25.75, 30.18, 42.32, 61.28, 111.31, 119.67, 121.74, 122.85, 126.75, 127.03, 128.03, 128.17, 128.75, 139.15, 152.81, 153.23; HRMS  $m/z$  ( $\text{M}^+$ ) calcd for  $\text{C}_{20}\text{H}_{23}\text{NO}$ : 293.1780, found: 293.1775.

**1-(2-Butylbenzofuran-3-yl)piperidine (3gd)**; oil;  $^1\text{H}$  NMR (400 MHz,  $\text{CDCl}_3$ )  $\delta$  0.94 (t,  $J = 7.3$  Hz, 3H), 1.35–1.43 (m, 2H), 1.58–1.60 (m, 2H), 1.64–1.70 (m, 6H), 2.79 (t,  $J = 7.3$  Hz, 2H), 3.08–3.11 (m, 4H), 7.11–7.18 (m, 2H), 7.34 (d,  $J = 7.3$  Hz, 1H), 7.60 (d,  $J = 7.3$  Hz, 1H);  $^{13}\text{C}$  NMR (100 MHz,  $\text{CDCl}_3$ )  $\delta$  13.81, 22.30, 24.36, 25.95, 26.86, 30.51, 53.72, 111.13, 119.82, 121.58, 122.71, 126.99, 129.30, 151.17, 153.13; HRMS  $m/z$  ( $\text{M}^+$ ) calcd for  $\text{C}_{17}\text{H}_{23}\text{NO}$ : 257.1780, found: 257.1777.

**4-(2-Butylbenzofuran-3-yl)morpholine (3ge)**; oil;  $^1\text{H}$  NMR (400 MHz,  $\text{CDCl}_3$ )  $\delta$  0.95 (t,  $J = 7.3$  Hz, 3H), 1.38 (tq,  $J = 7.3, 7.4$  Hz, 2H), 1.65 (tt,  $J = 7.3, 7.4$  Hz, 2H), 2.80 (t,  $J = 7.3$  Hz, 2H), 3.15 (t,  $J = 4.6$  Hz, 4H), 3.85 (t,  $J = 4.6$  Hz, 4H), 7.14–7.21 (m, 2H), 7.37 (d,  $J = 7.8$  Hz, 1H), 7.62 (d,  $J = 8.2$  Hz, 1H);  $^{13}\text{C}$  NMR (100 MHz,  $\text{CDCl}_3$ )  $\delta$  13.78, 22.29, 25.70, 30.36, 52.60, 67.75, 111.35, 119.59, 121.88, 123.02, 126.38, 127.92, 152.43, 153.19; HRMS  $m/z$  ( $\text{M}^+$ ) calcd for  $\text{C}_{16}\text{H}_{21}\text{NO}_2$ : 259.1572, found: 259.1573.

**2-(2-Butylbenzofuran-3-yl)-1,2,3,4-tetrahydroisoquinoline (3gf)**; oil;  $^1\text{H}$  NMR (400 MHz,  $\text{CDCl}_3$ )  $\delta$  0.92 (t,  $J = 7.3$  Hz, 3H), 1.34–1.40 (m, 2H), 1.67–1.71 (m, 2H), 2.80 (t,  $J = 7.3$  Hz, 2H), 3.01 (bs, 2H), 3.47 (bs, 2H), 4.34 (s, 2H), 7.04–7.06 (m, 1H), 7.13–7.23 (m, 5H), 7.39 (d,  $J = 7.8$  Hz, 1H), 7.55 (d,  $J = 7.4$  Hz, 1H);  $^{13}\text{C}$  NMR (100 MHz,  $\text{CDCl}_3$ )  $\delta$  13.82, 22.32, 25.75, 30.10, 30.40, 50.38, 54.52, 111.33, 119.61, 121.85, 122.97, 125.72, 126.11, 126.31, 126.62, 128.05, 129.05, 134.58, 135.38, 152.45, 153.27; HRMS  $m/z$  ( $\text{M}^+$ ) calcd for  $\text{C}_{21}\text{H}_{23}\text{NO}$ : 305.1780, found: 305.1778.

**N-Allyl-N-methyl-2-(1-propen-2-yl)benzofuran-3-amine (3lg)**; oil;  $^1\text{H}$  NMR (600 MHz,  $\text{CDCl}_3$ )  $\delta$  2.25 (s, 3H), 2.84 (s, 3H), 3.74 (d,  $J = 6.2$  Hz, 2H), 5.09 (dd,  $J = 10.2, 1.4$  Hz, 1H), 5.17–5.20 (m, 1H), 5.20 (s, 1H), 5.81 (s, 1H), 5.88 (ddt,  $J = 17.0, 10.2, 6.2$  Hz, 1H), 7.15 (t,  $J = 7.3$  Hz, 1H), 7.23 (t,  $J = 7.3$  Hz, 1H), 7.39 (d,  $J = 8.2$  Hz, 1H), 7.66 (d,  $J = 8.2$  Hz, 1H);  $^{13}\text{C}$  NMR (150 MHz,  $\text{CDCl}_3$ )  $\delta$  20.47, 41.45, 59.64, 111.57, 114.94, 117.06, 120.76, 121.87, 124.08, 127.29, 130.04, 134.25, 135.74, 148.64, 152.72; HRMS  $m/z$  ( $\text{M}^+$ ) calcd for  $\text{C}_{15}\text{H}_{17}\text{NO}$ : 227.1310, found: 227.1307.

**1,3,5-Trimethyl-2,3-dihydro-1H-benzofuro[3,2-b]azepine (4)**; oil;  $^1\text{H}$  NMR (400 MHz,  $\text{CDCl}_3$ )  $\delta$  1.22 (d,  $J = 7.4$  Hz, 3H), 2.22 (t,  $J = 1.8$  Hz, 3H), 2.38–2.50 (m, 1H), 2.58 (dd,  $J = 13.3, 7.8$  Hz, 1H), 2.99 (s, 3H), 3.12 (dt,  $J = 13.3, 1.4$  Hz, 1H), 5.55–5.56 (m, 1H), 7.17 (td,  $J = 6.8, 0.9$  Hz, 1H), 7.23 (td,  $J = 7.8, 1.4$  Hz, 1H), 7.38 (d,  $J = 7.8$  Hz, 1H), 7.63 (d,  $J = 8.2$  Hz, 1H);  $^{13}\text{C}$  NMR (100 MHz,  $\text{CDCl}_3$ )  $\delta$  20.38, 20.55, 32.03, 43.58, 59.63, 111.38, 119.58, 121.66, 124.12, 125.93, 130.36, 132.51, 141.96, 152.83 (One  $\text{sp}^2$   $^{13}\text{C}$  signal was overlapped by other one.); HRMS  $m/z$  ( $\text{M}^+$ ) calcd for  $\text{C}_{15}\text{H}_{17}\text{NO}$ : 227.1310, found: 227.1308.

[ $^1\text{H}$  and  $^{13}\text{C}$  NMR spectra of **3aa**]

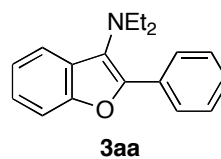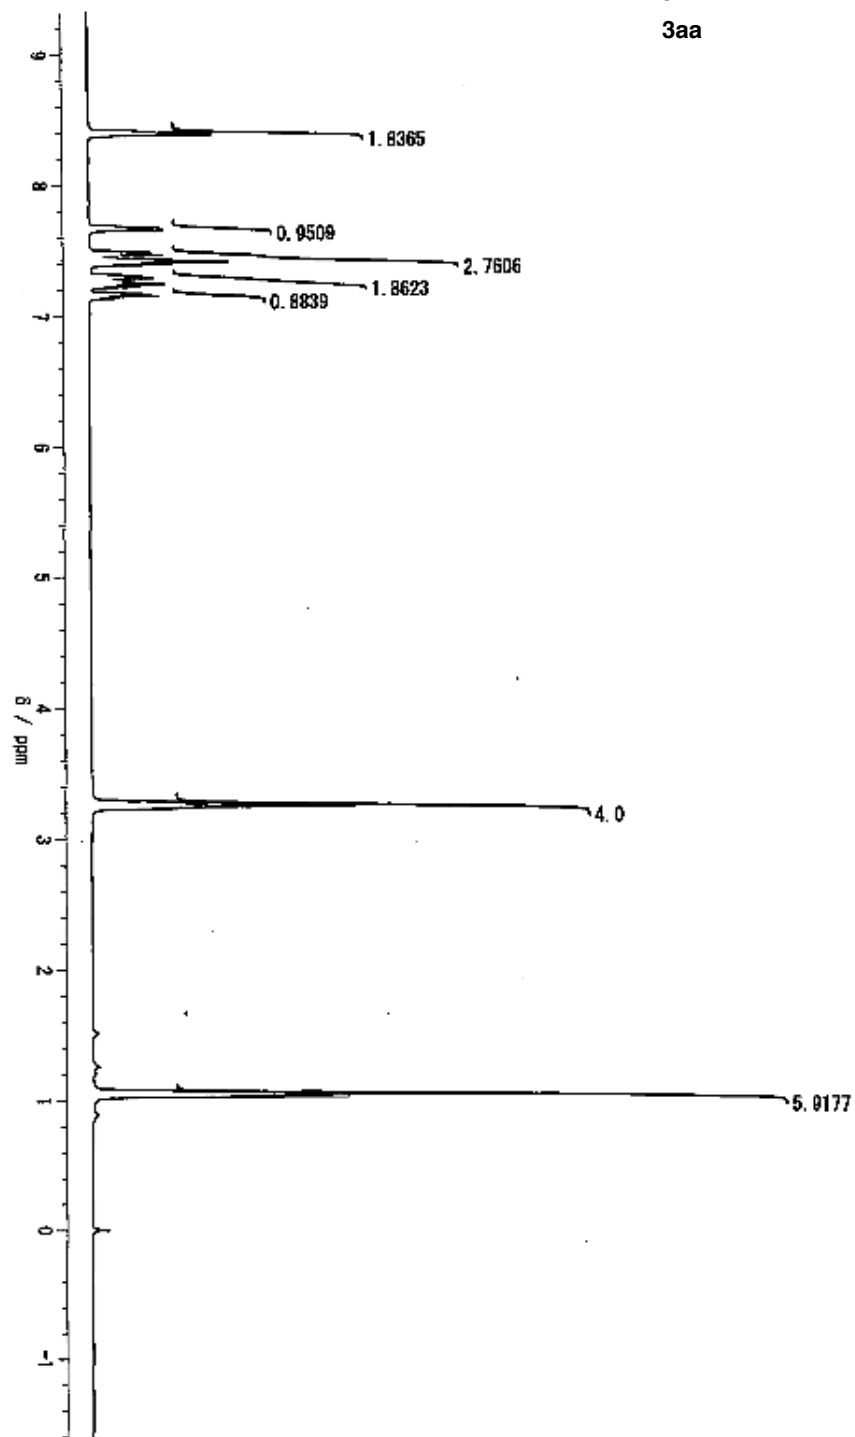

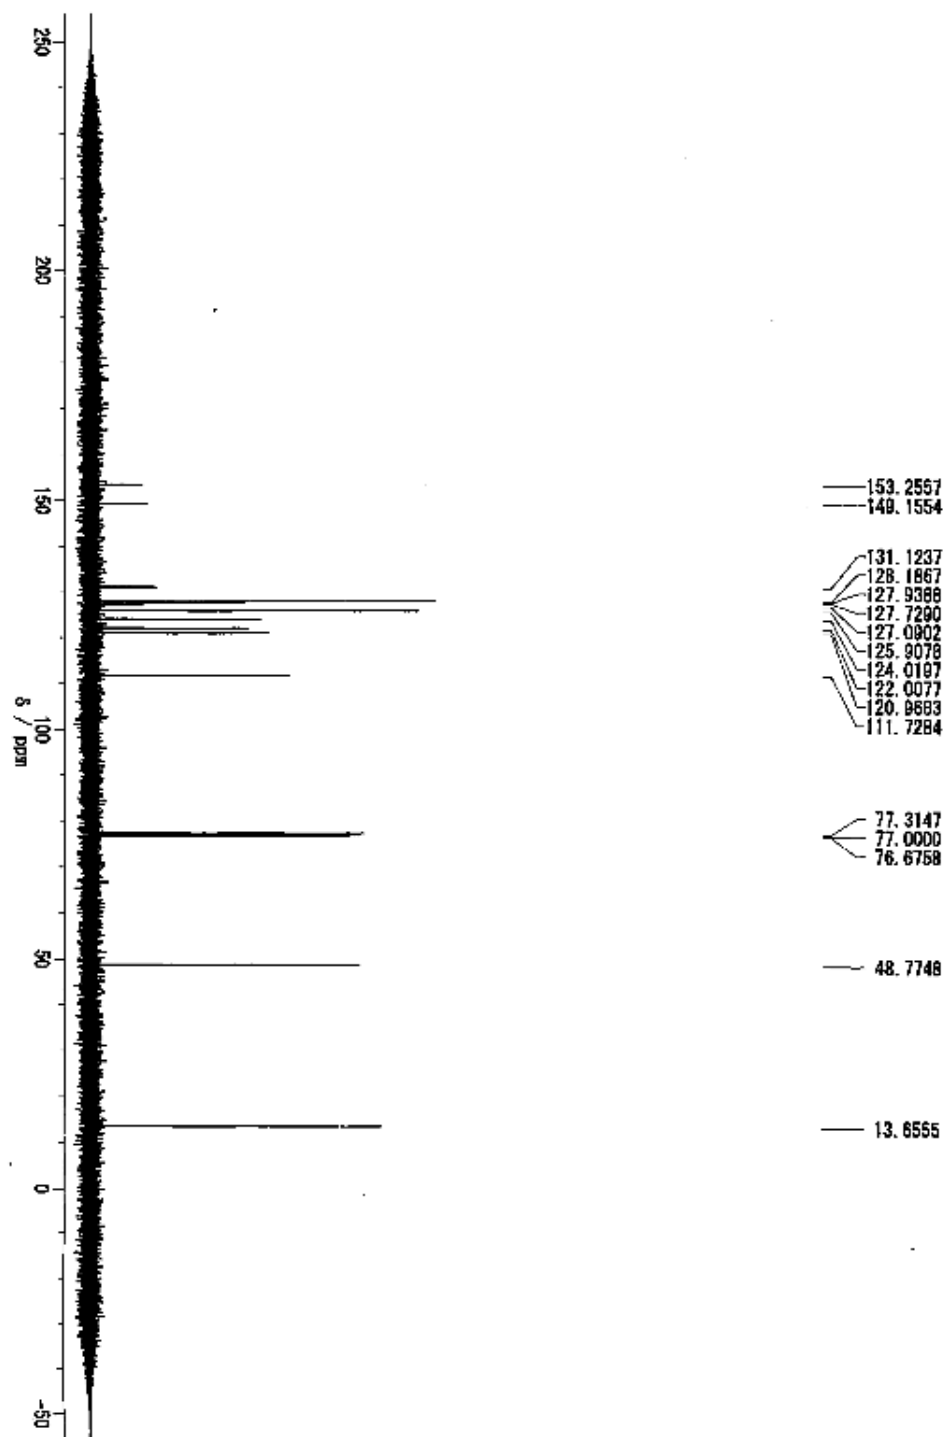



[ $^1\text{H}$  and  $^{13}\text{C}$  NMR spectra of **3ba**]

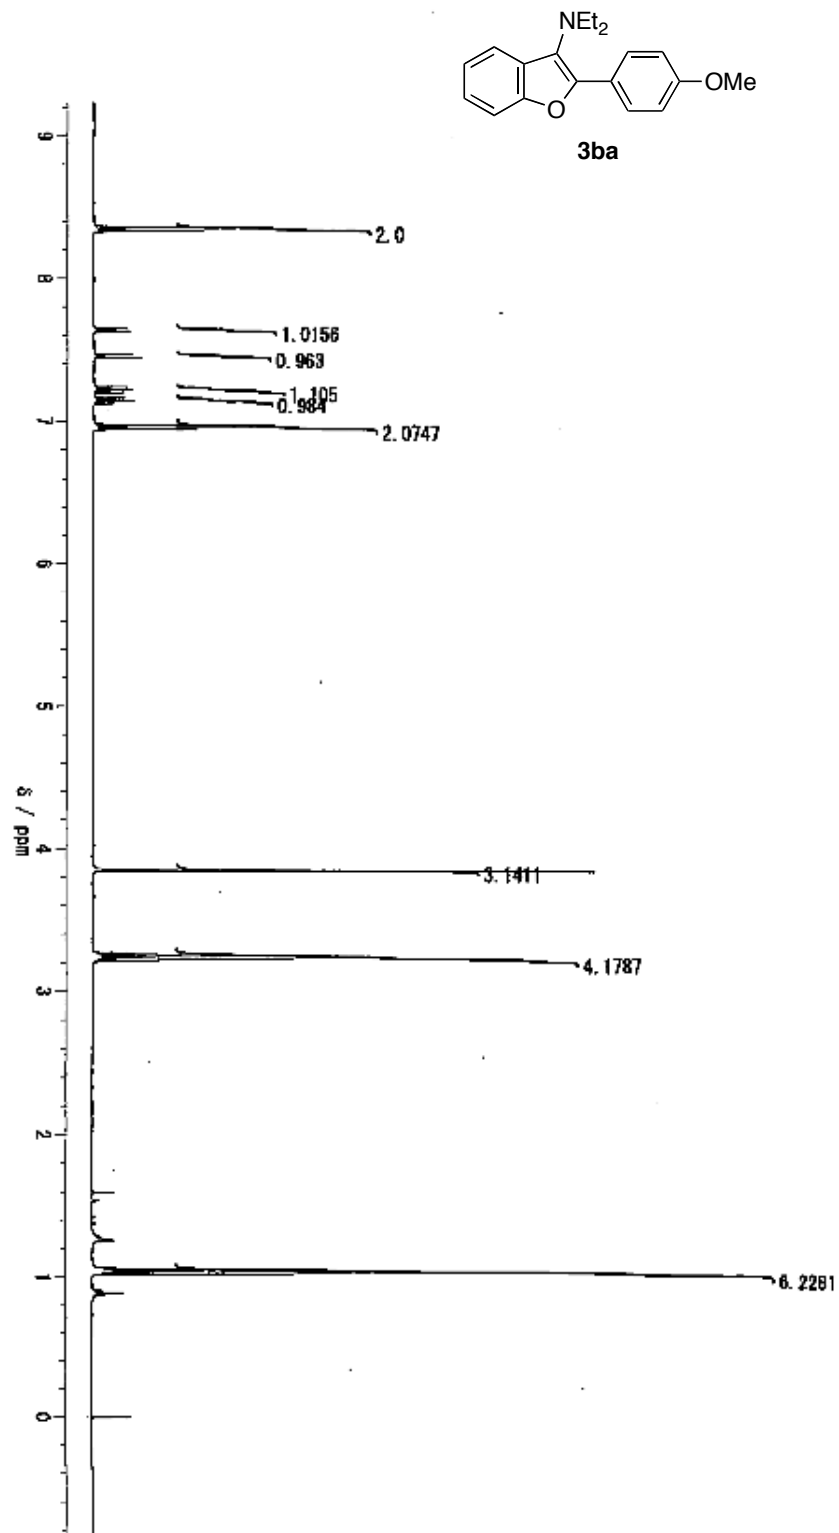

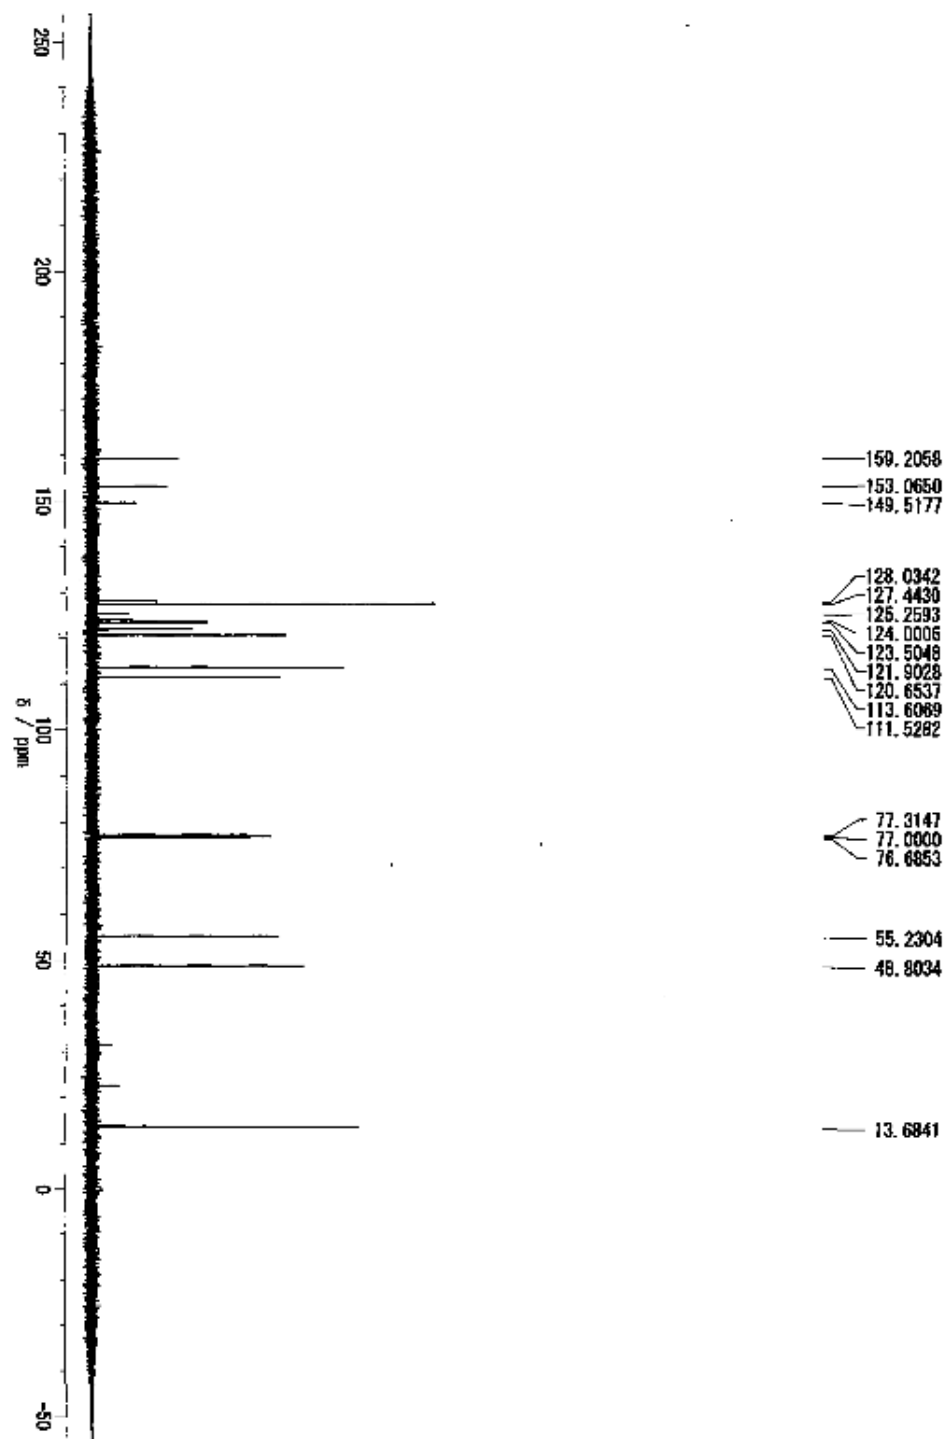

[ $^1\text{H}$ ,  $^{13}\text{C}$ , and  $^{19}\text{F}$  NMR spectra of **3ca**]

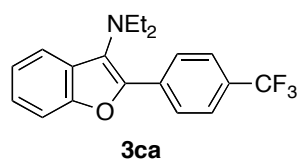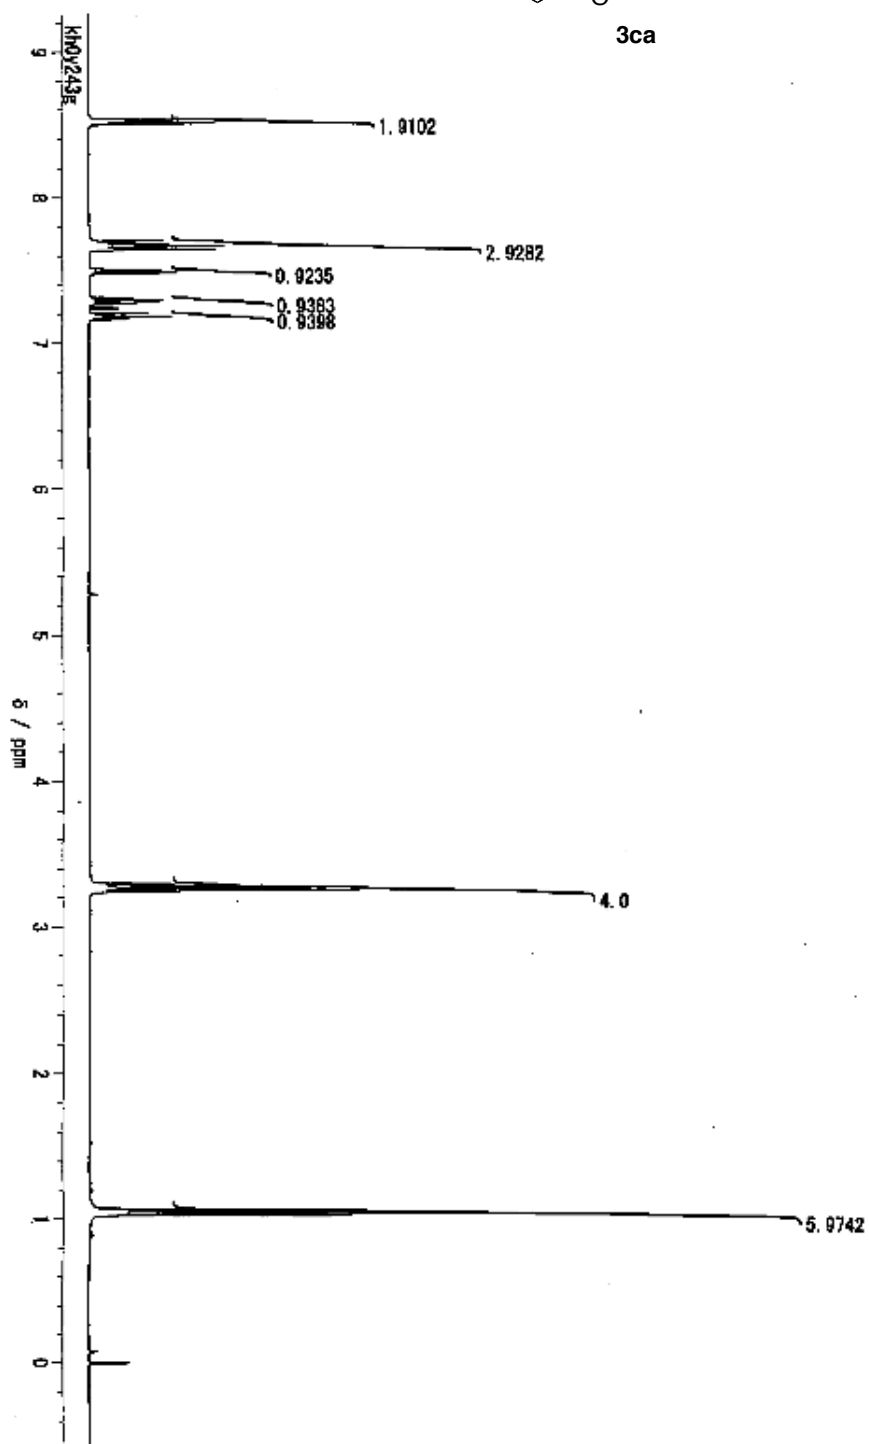

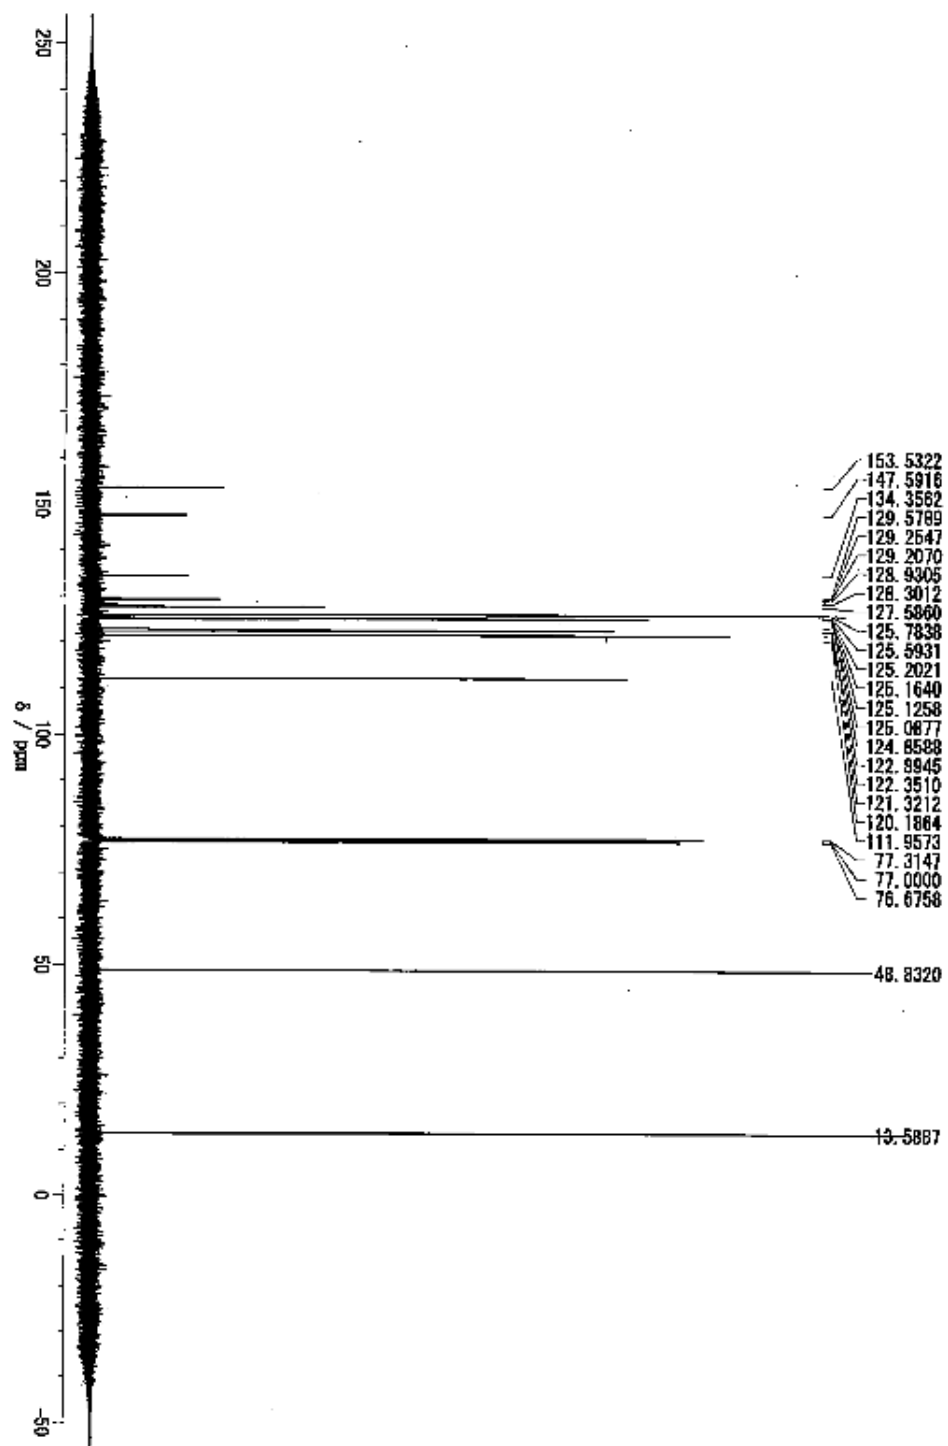

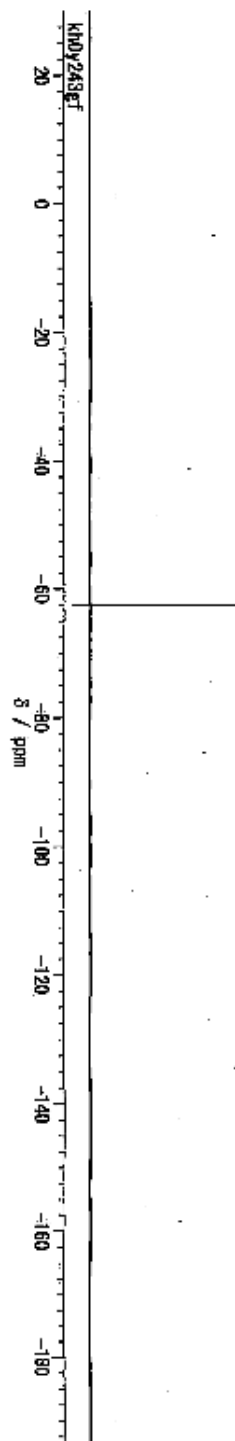

[ $^1\text{H}$  and  $^{13}\text{C}$  NMR spectra of **3da**]

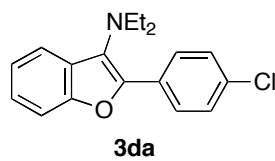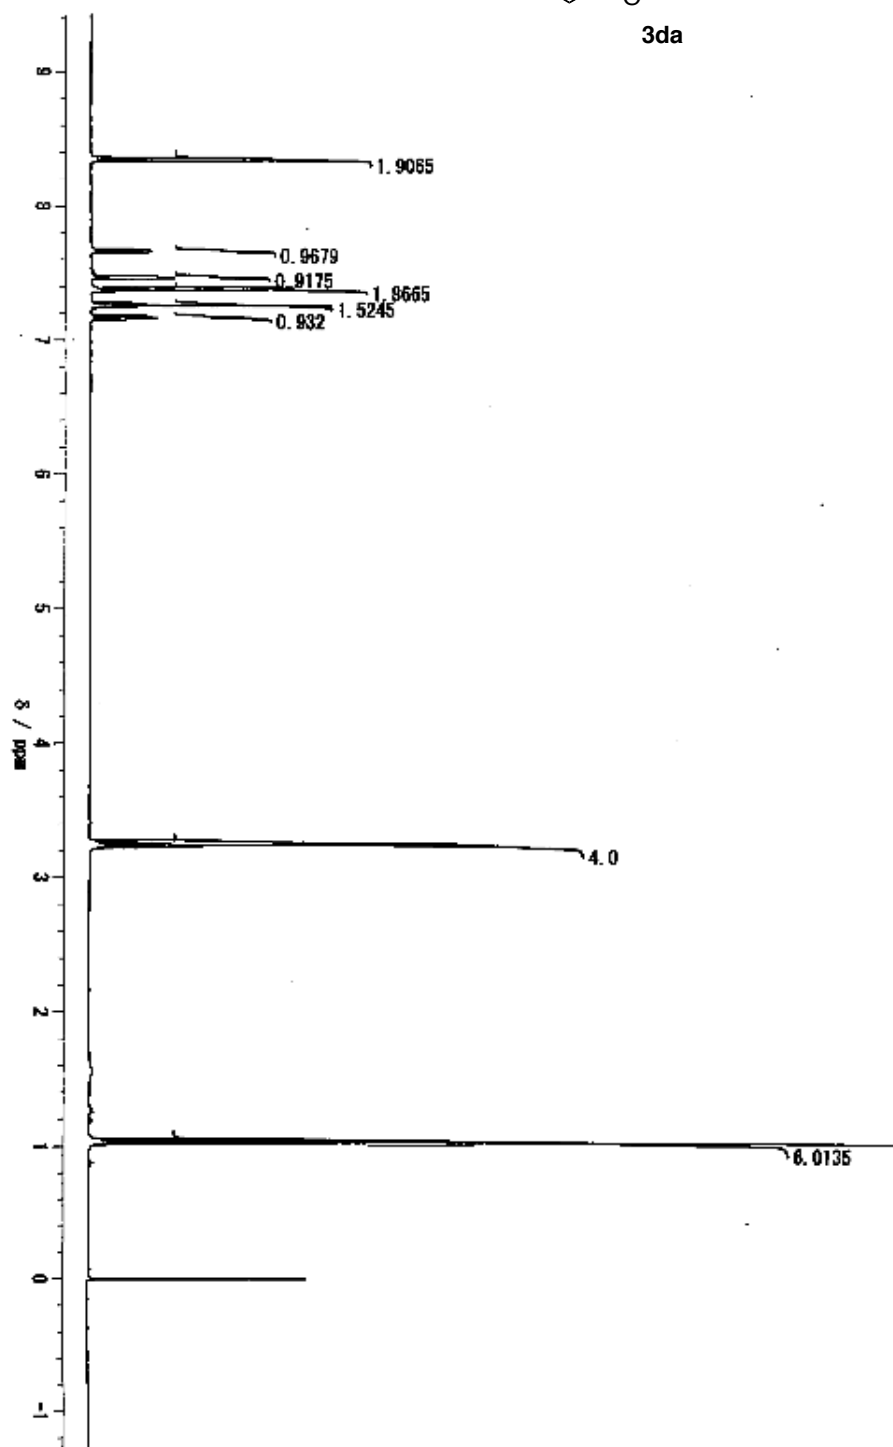

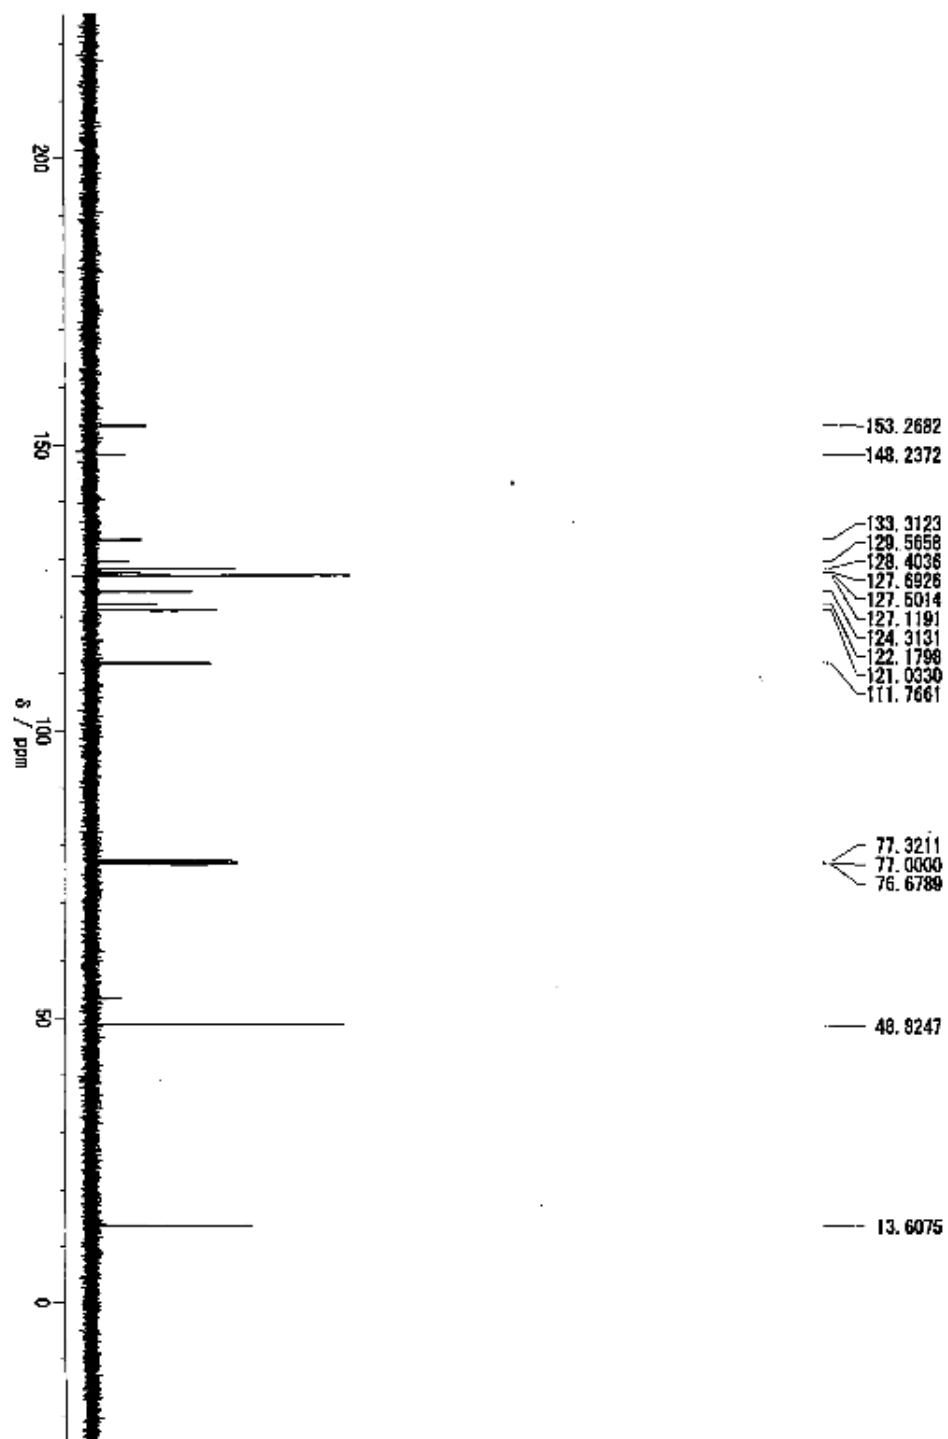

[ $^1\text{H}$  and  $^{13}\text{C}$  NMR spectra of **3ea**]

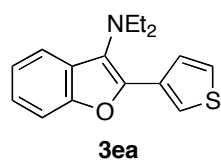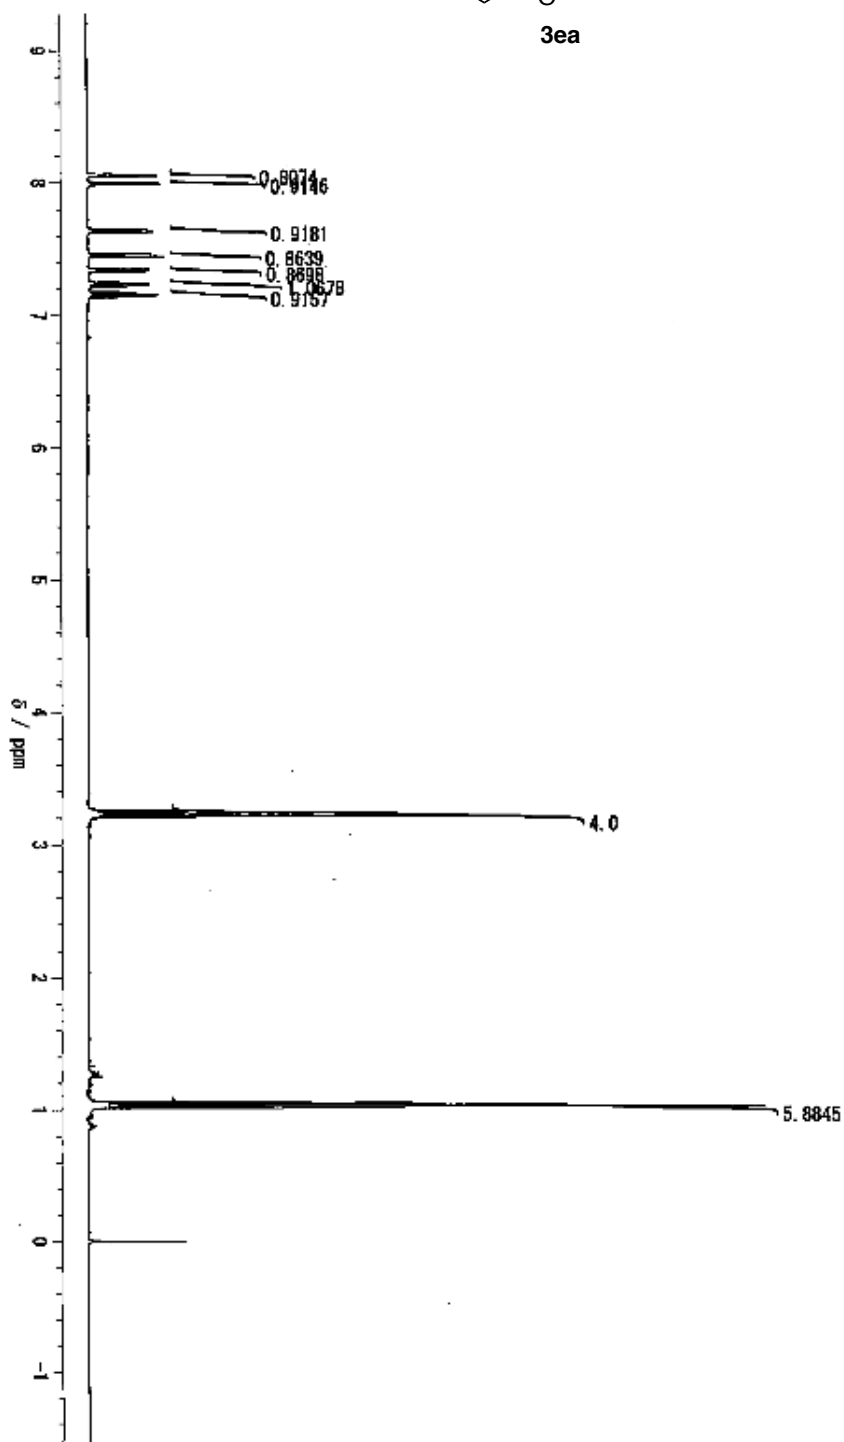



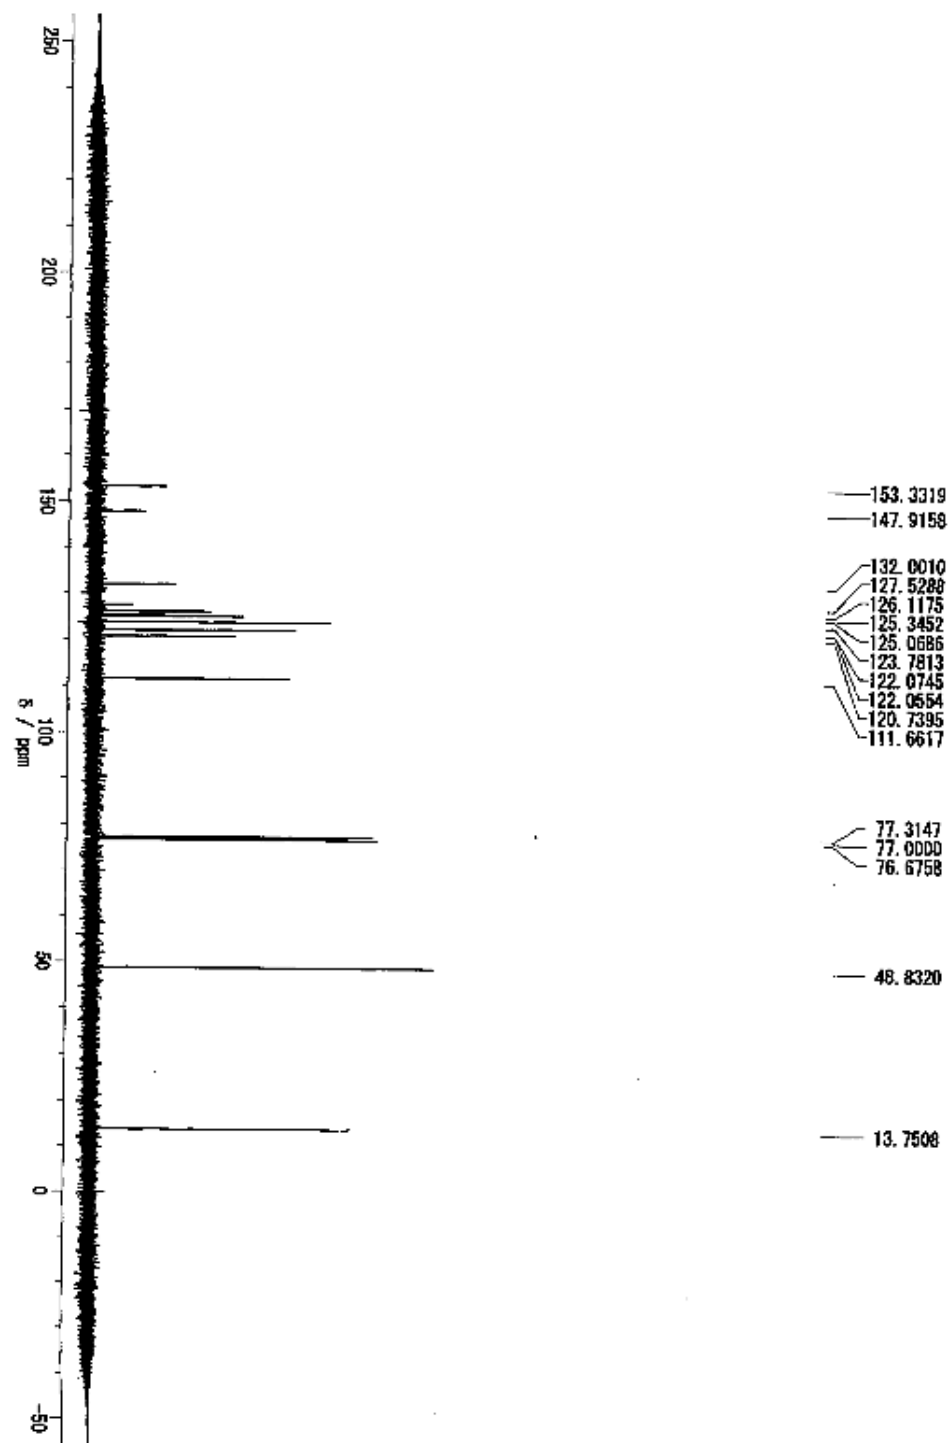

[ $^1\text{H}$  and  $^{13}\text{C}$  NMR spectra of **3fa**]

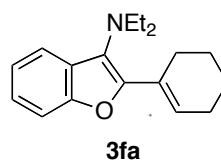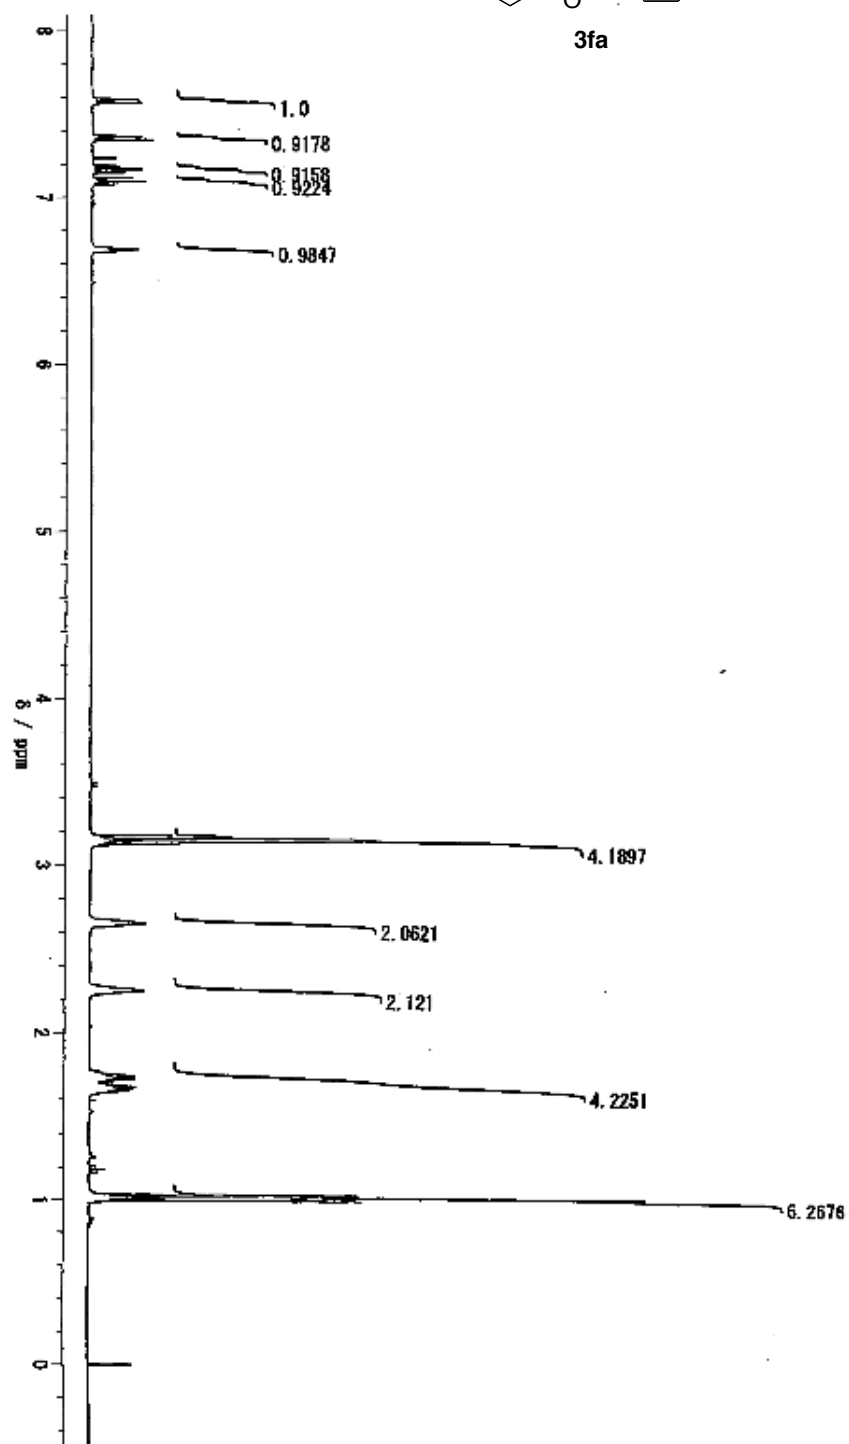

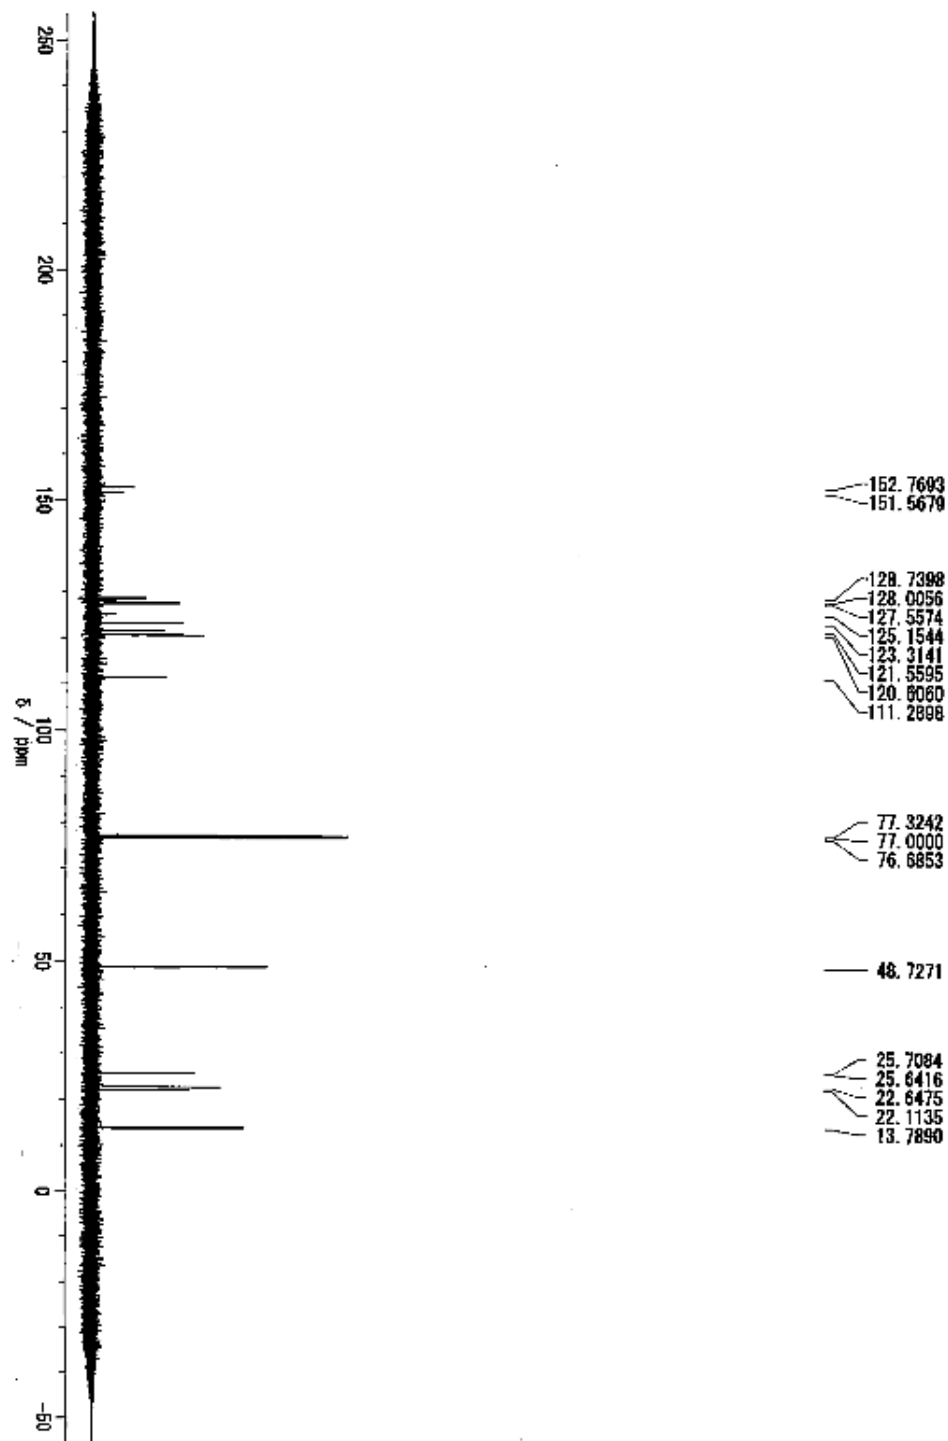

[ $^1\text{H}$  and  $^{13}\text{C}$  NMR spectra of **3ga**]

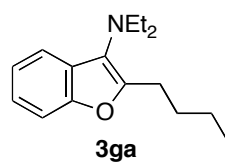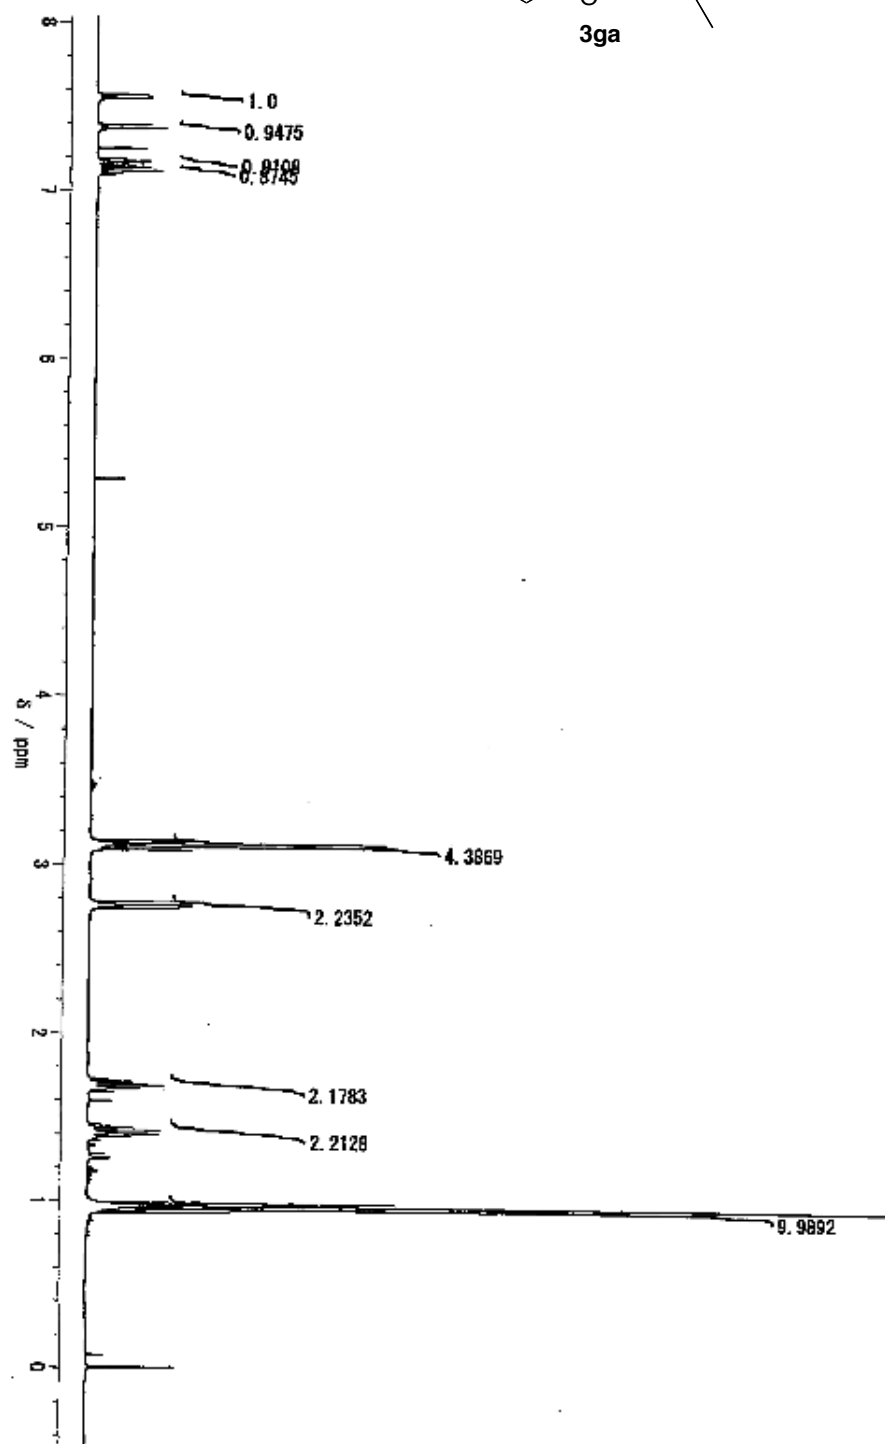

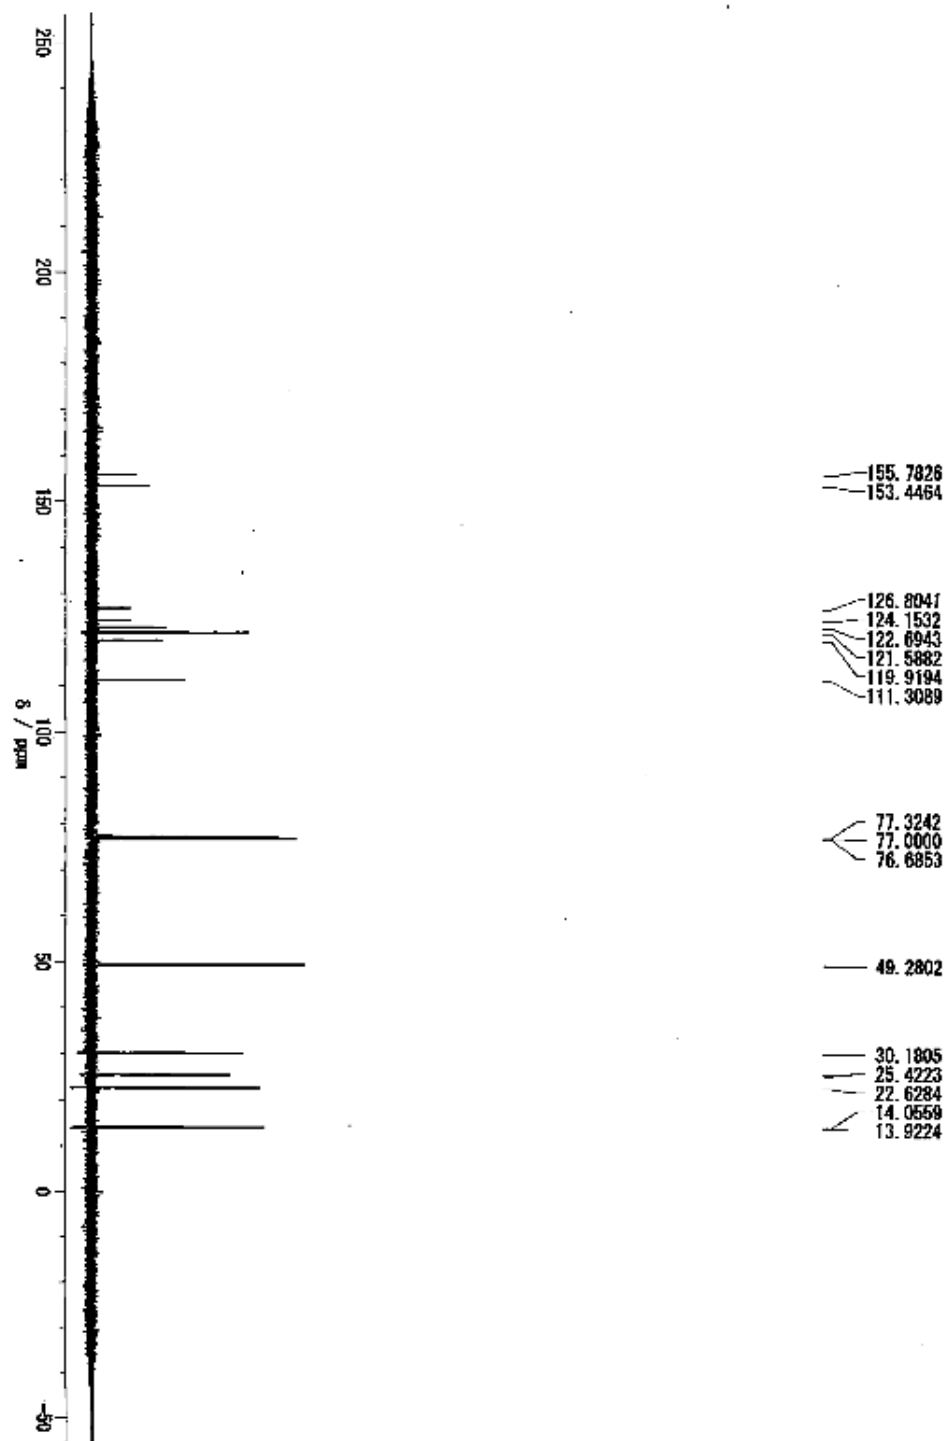

[ $^1\text{H}$  and  $^{13}\text{C}$  NMR spectra of **3ha**]

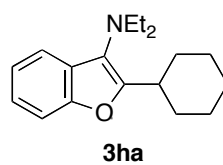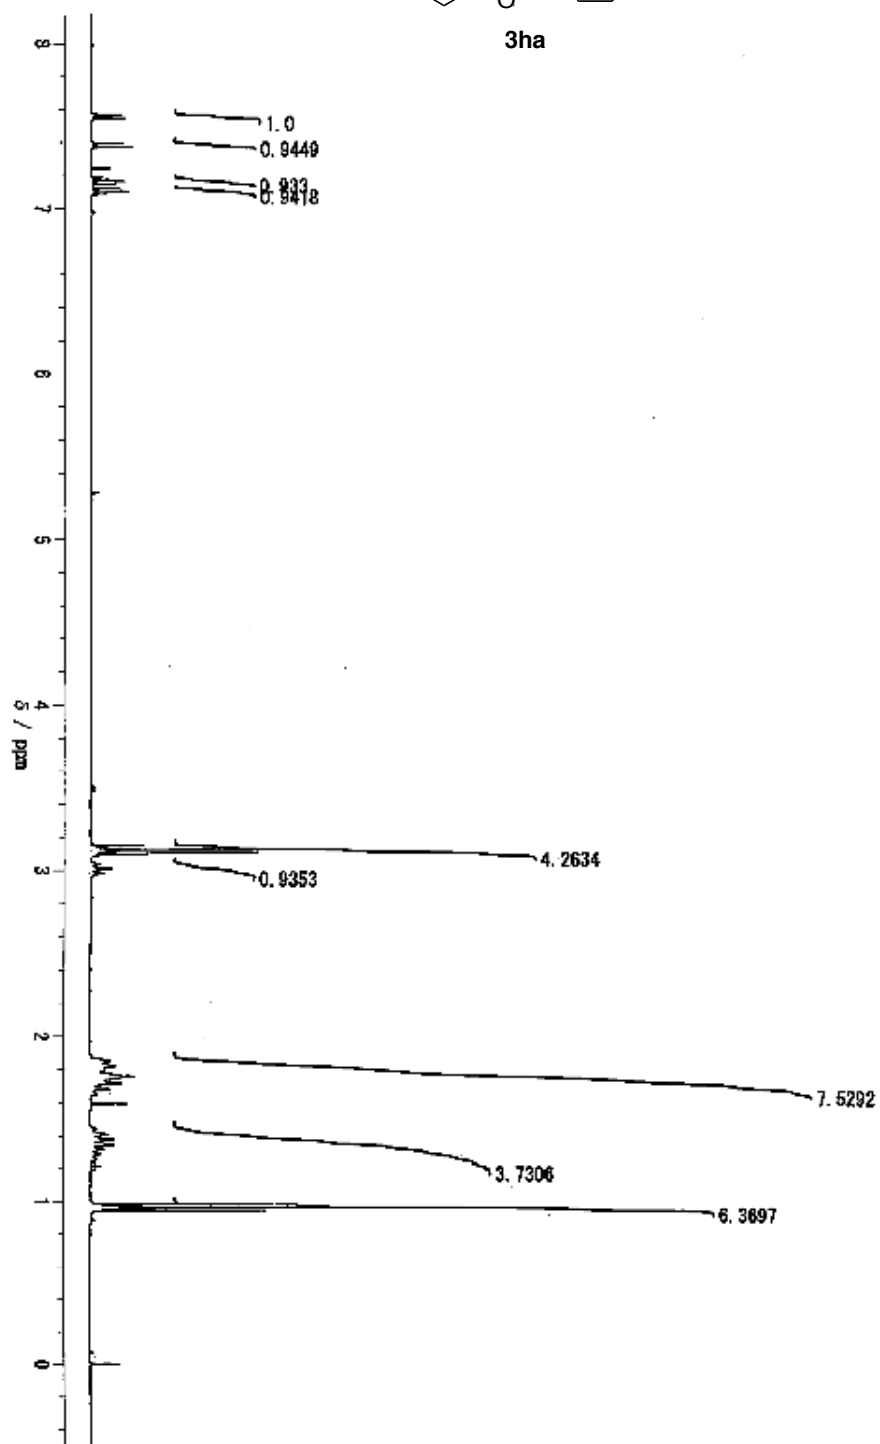

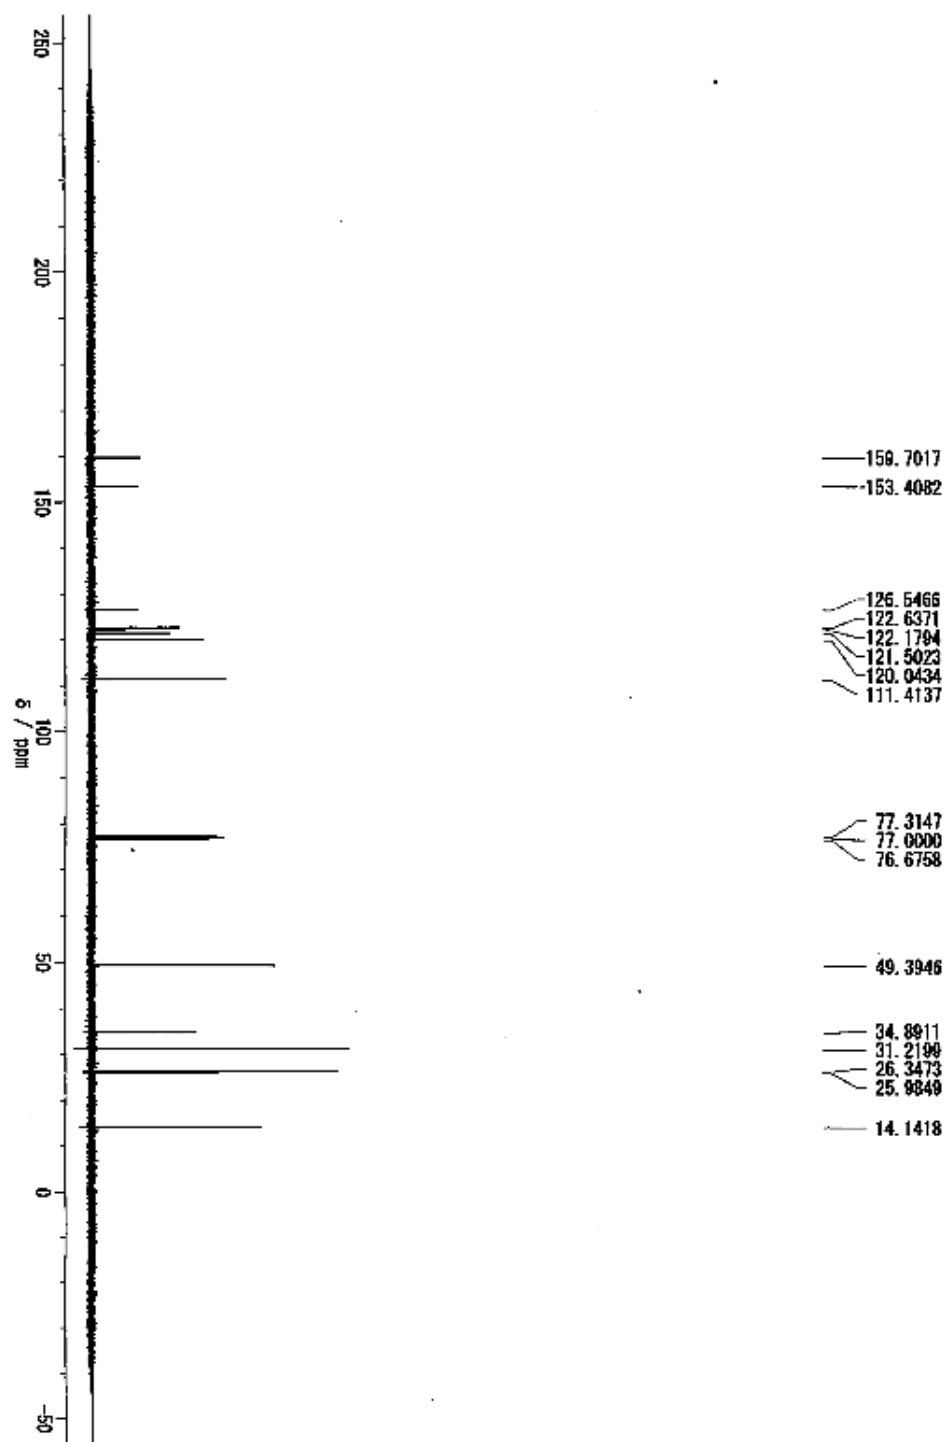

[ $^1\text{H}$  and  $^{13}\text{C}$  NMR spectra of **3ia**]

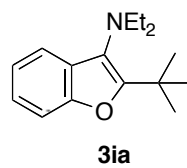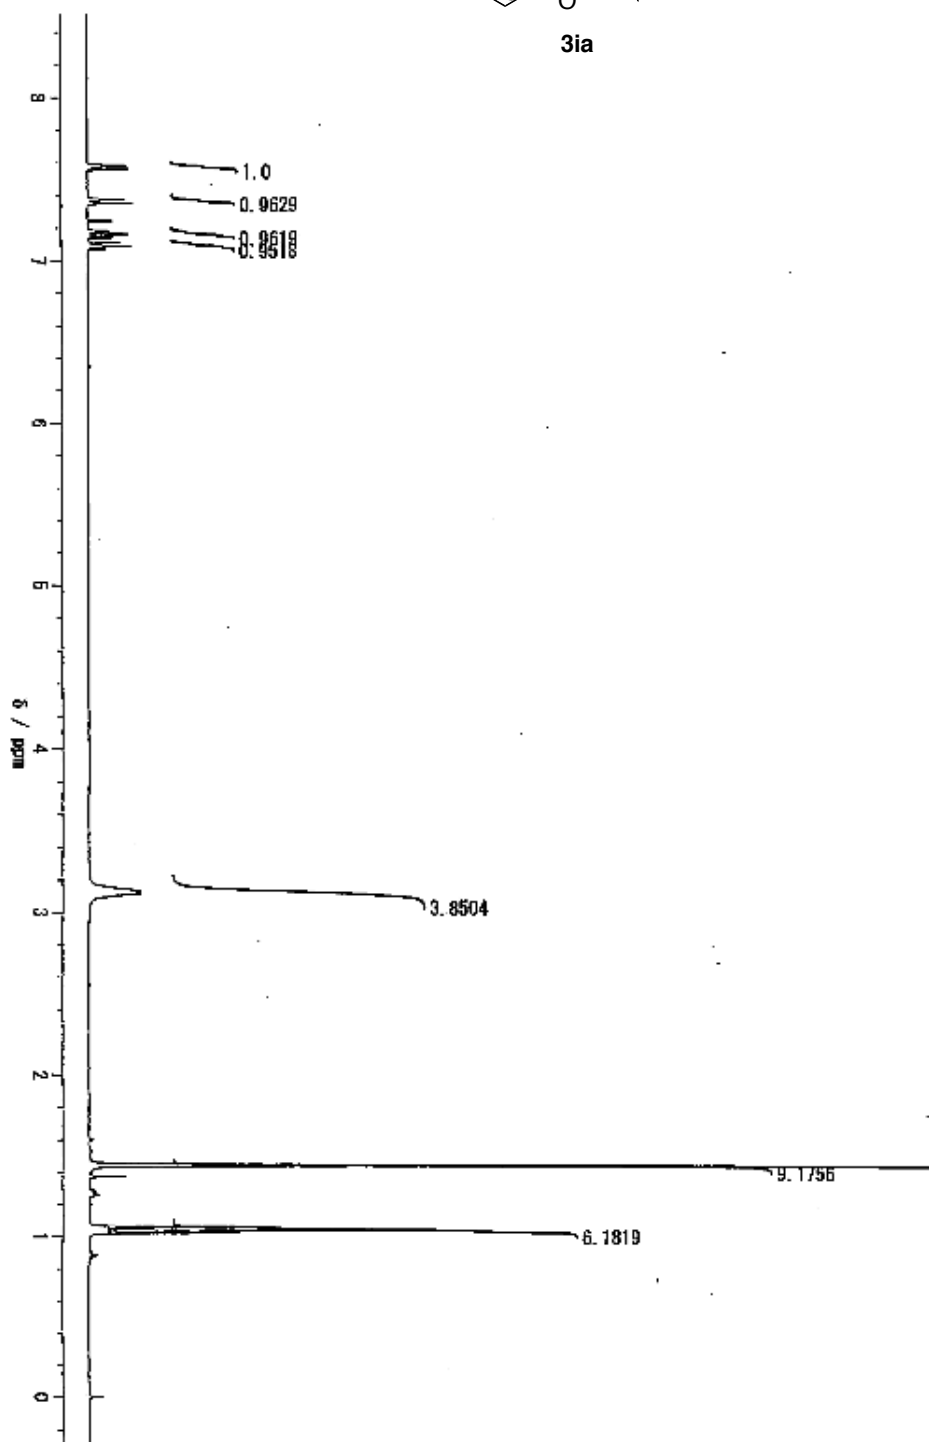



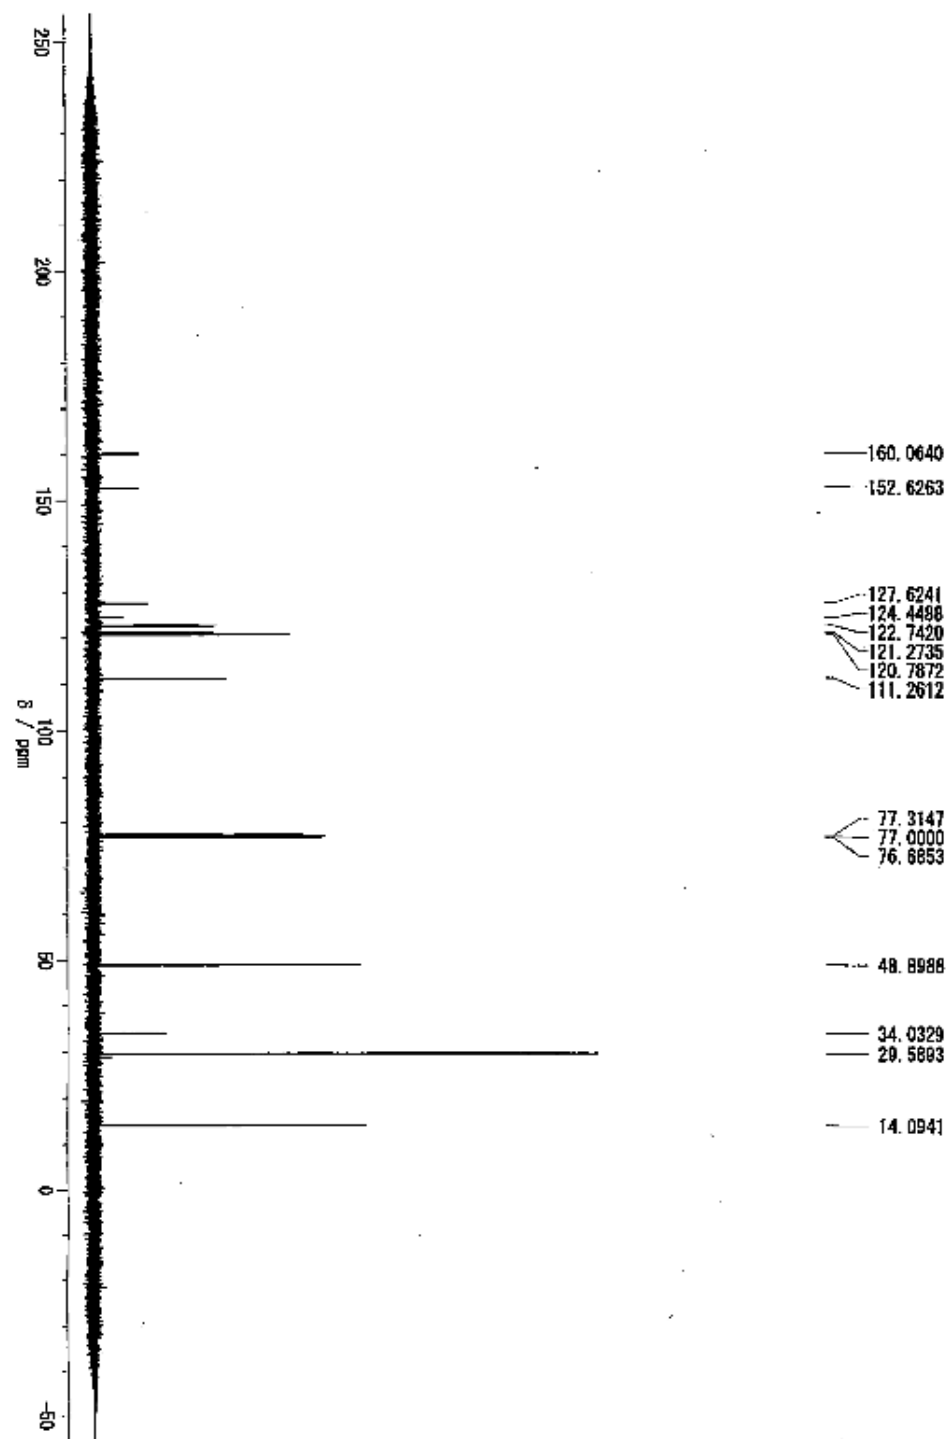

[ $^1\text{H}$  and  $^{13}\text{C}$  NMR spectra of **3ja**]

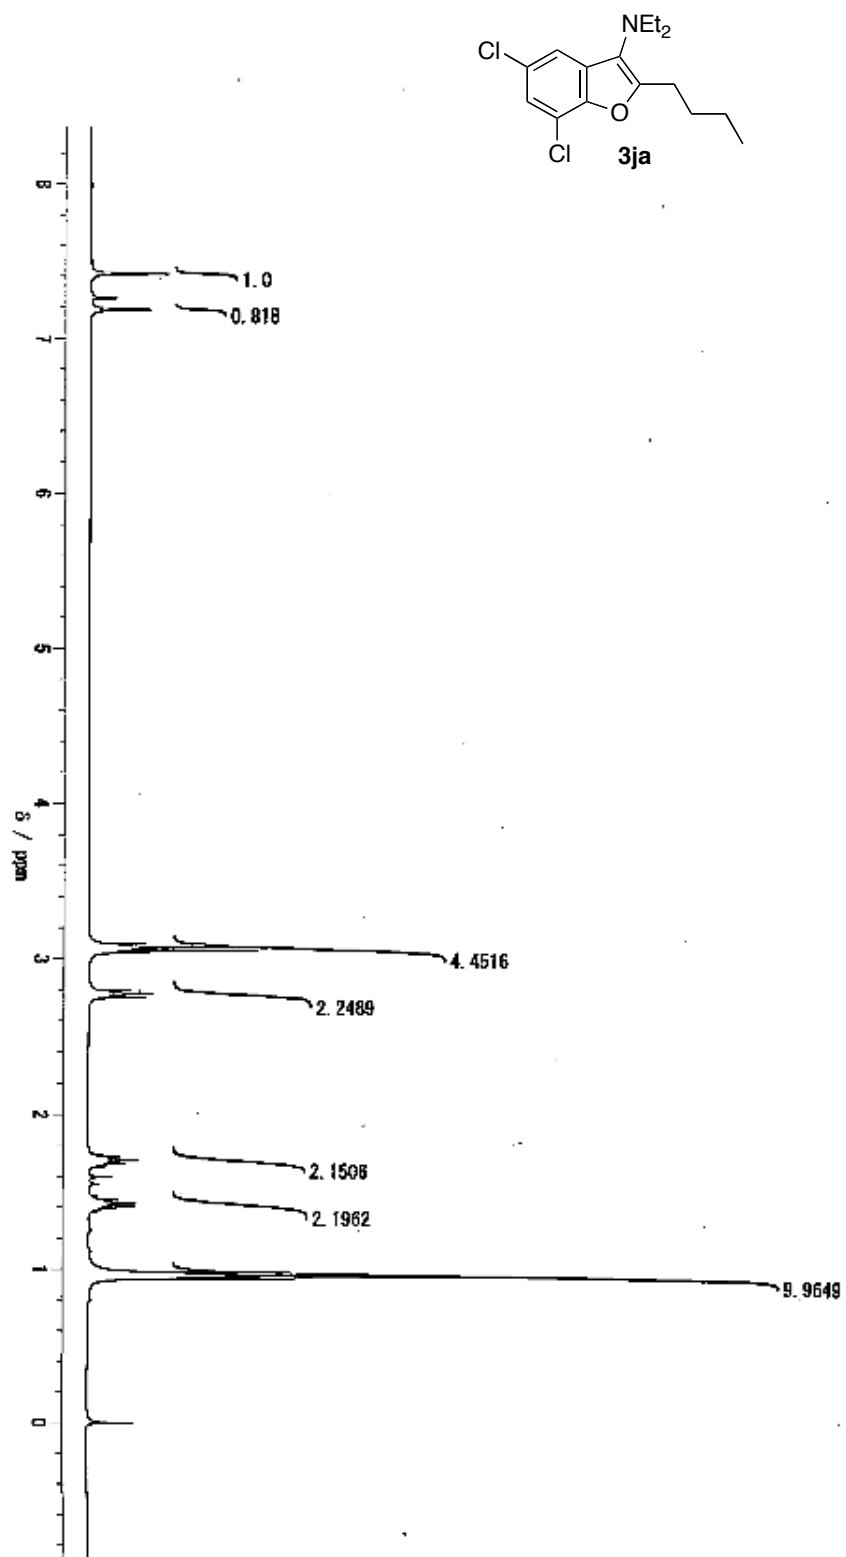

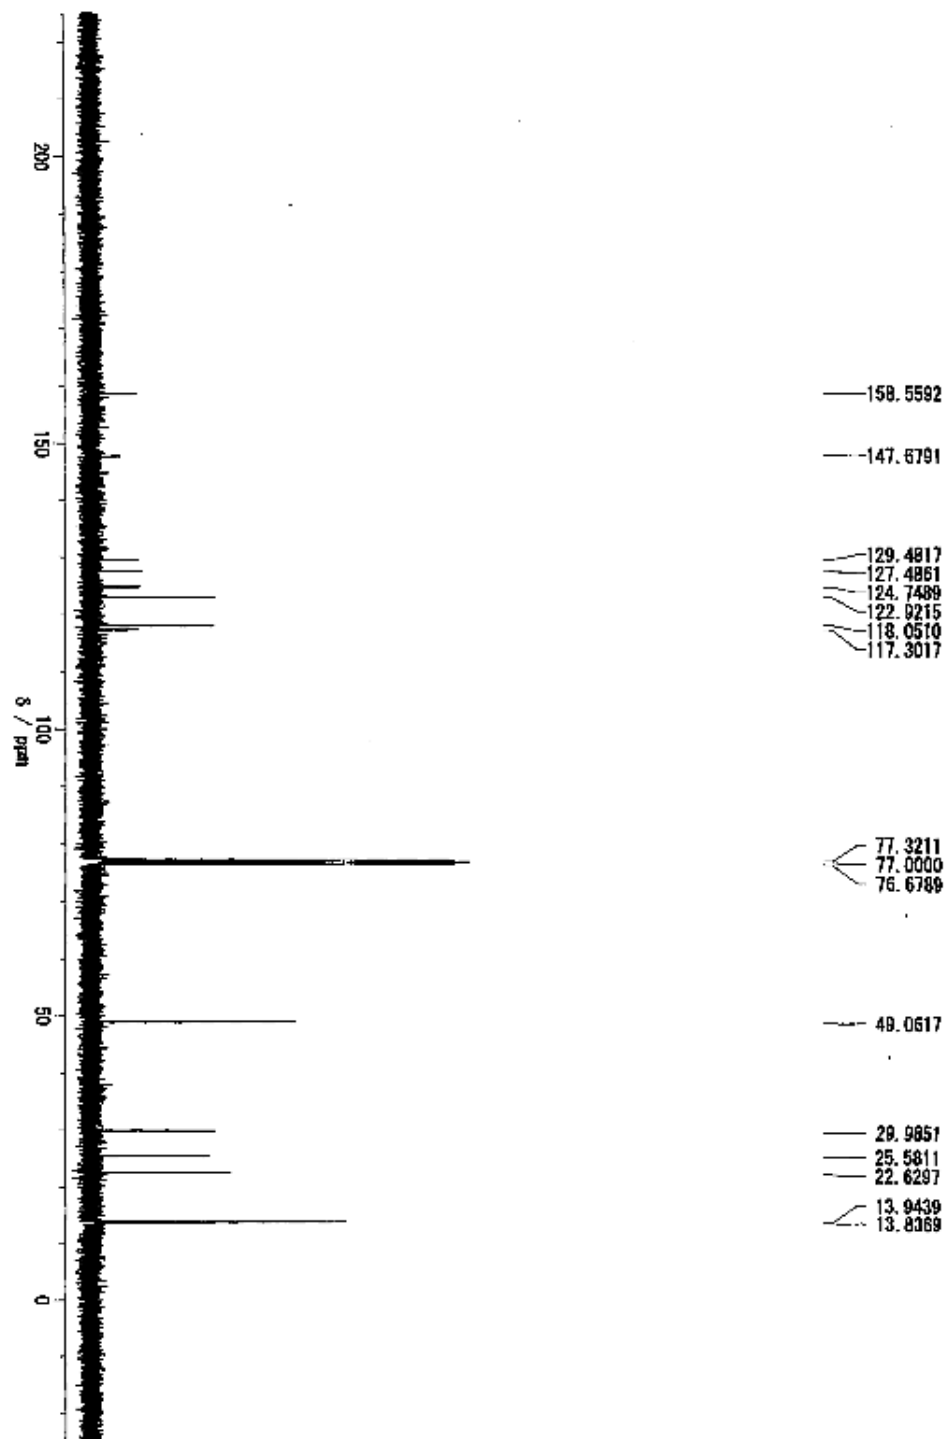

[ $^1\text{H}$  and  $^{13}\text{C}$  NMR spectra of **3ka**]

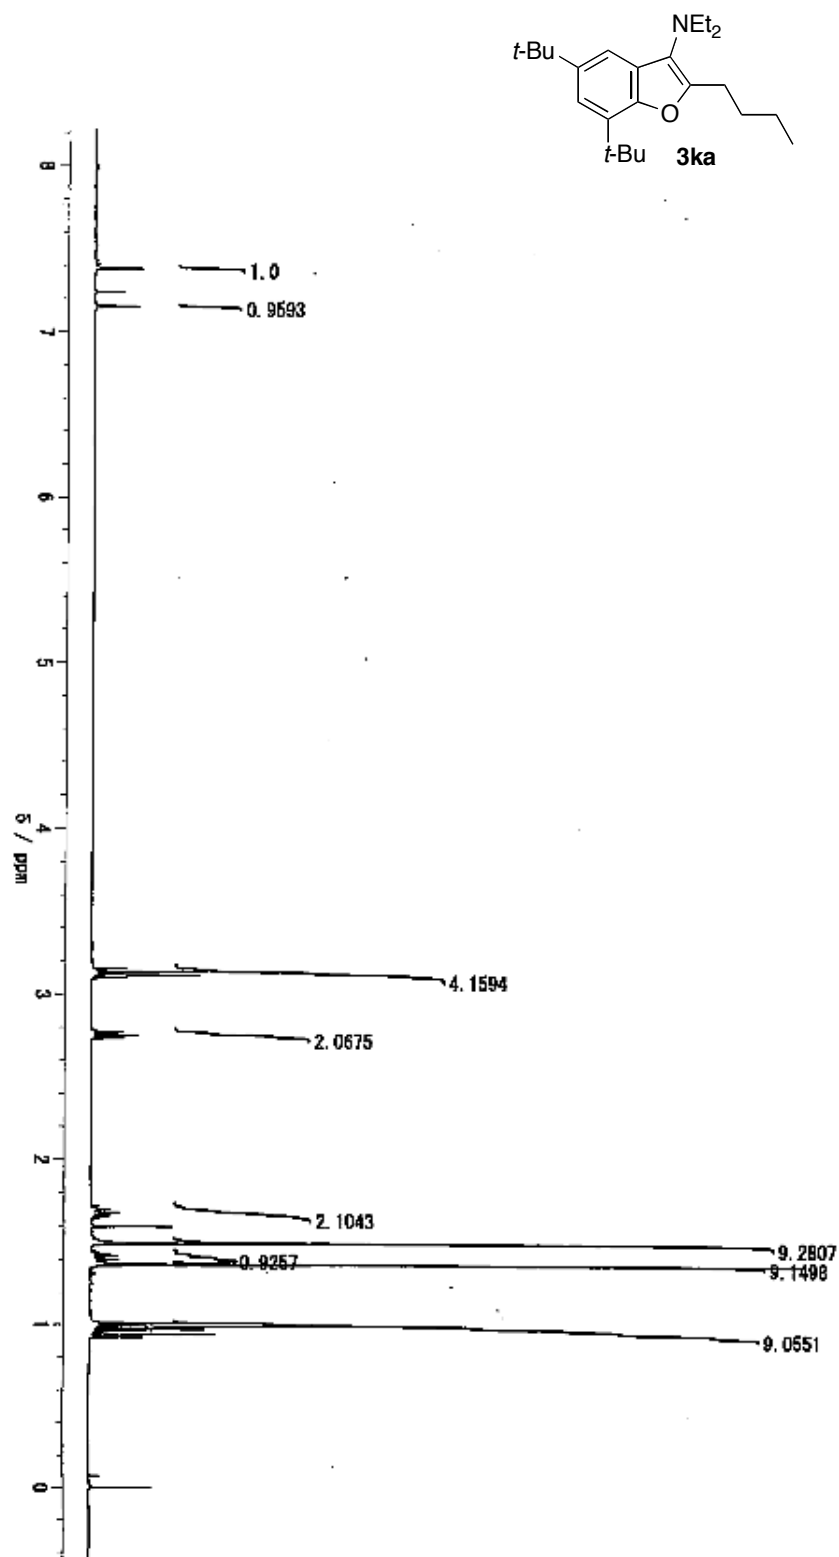

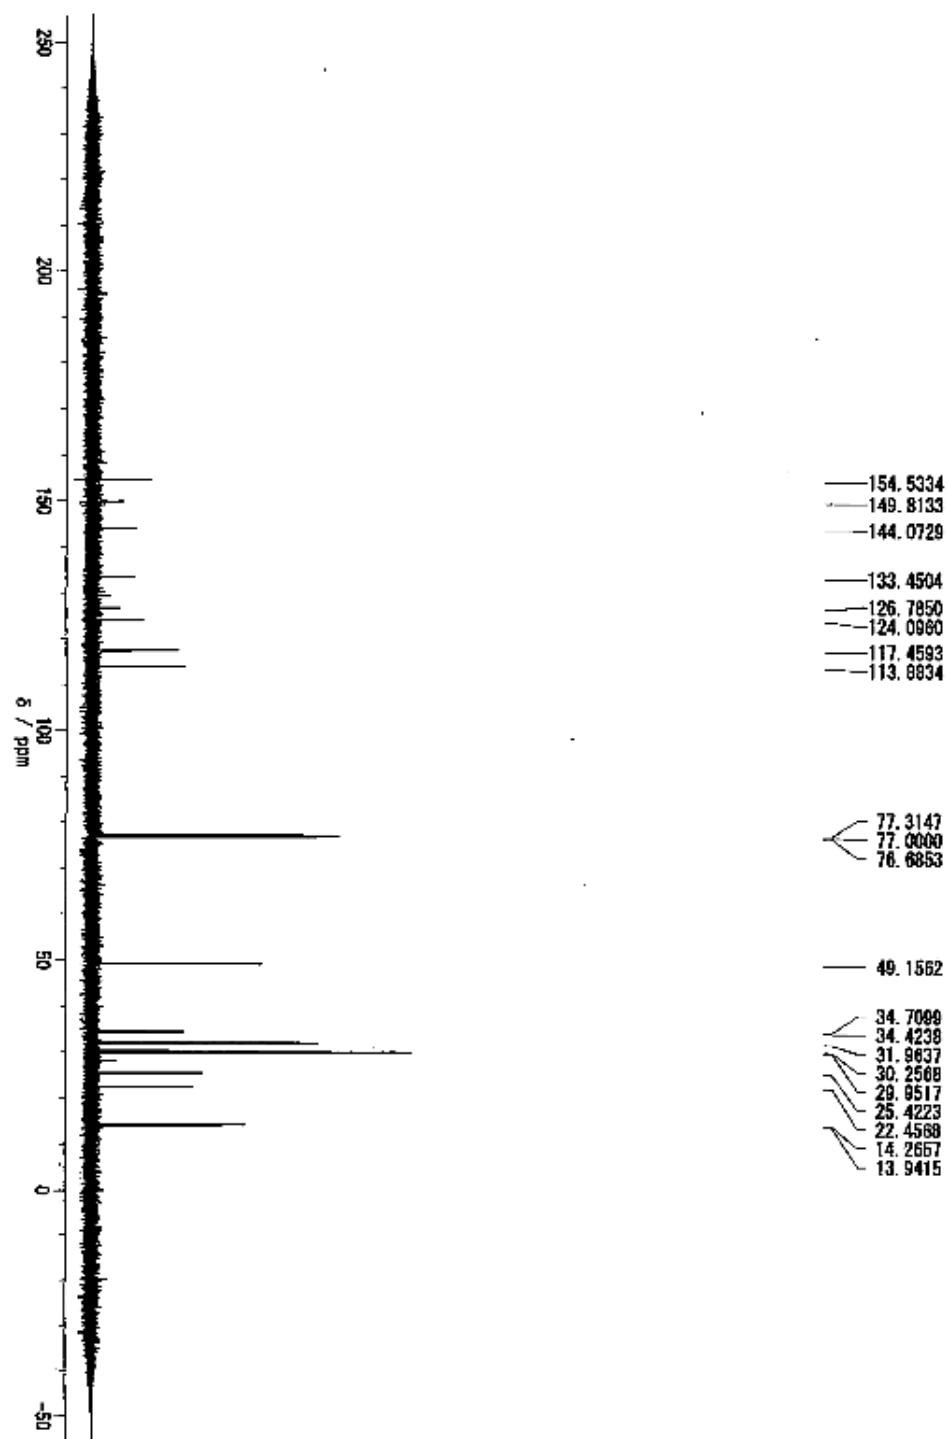

[ $^1\text{H}$  and  $^{13}\text{C}$  NMR spectra of **3gb**]

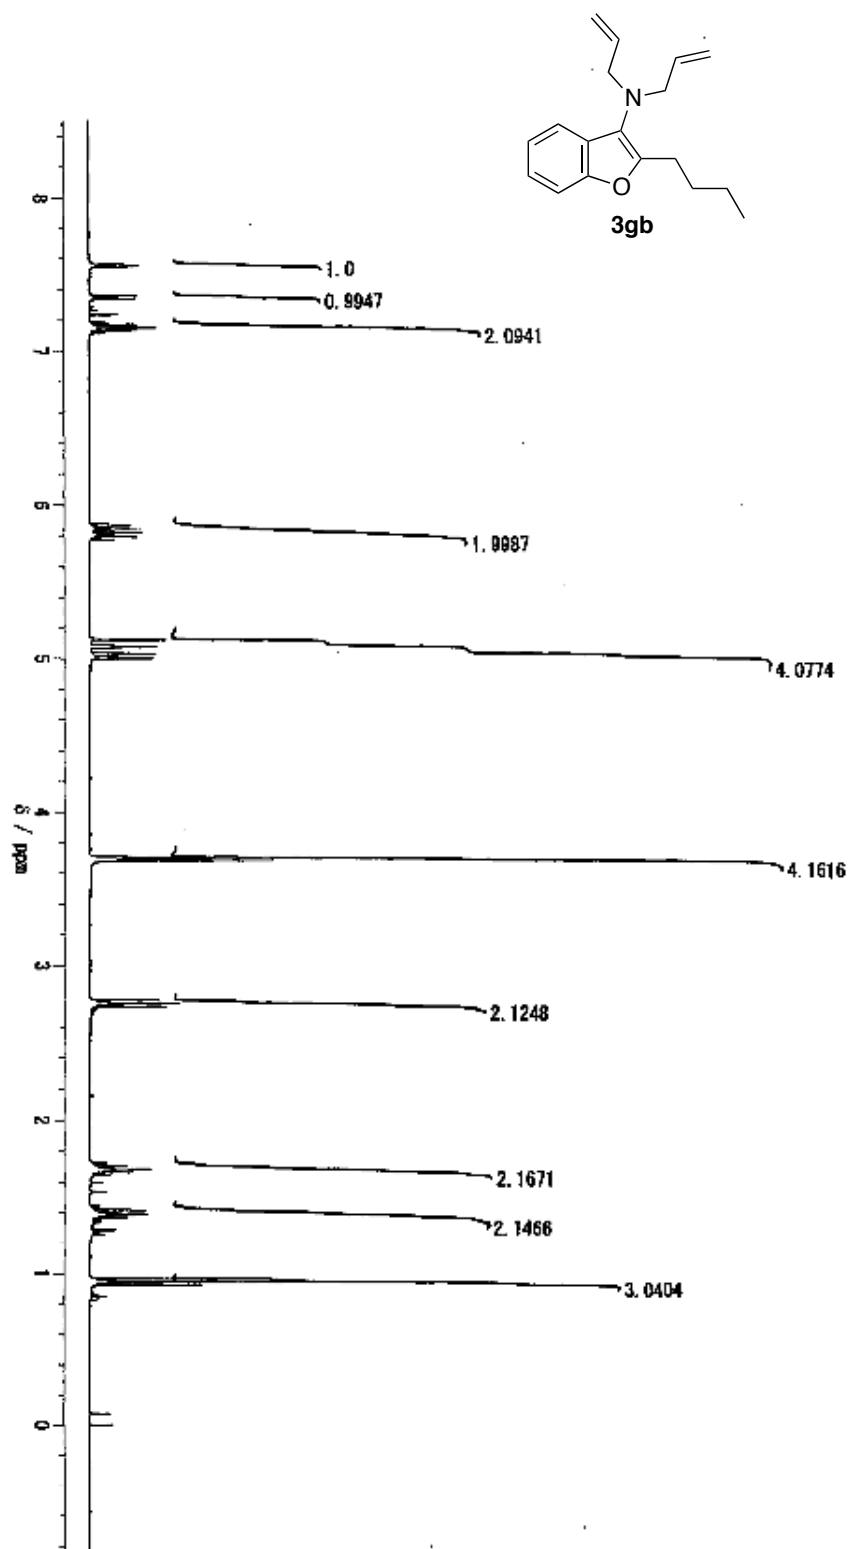

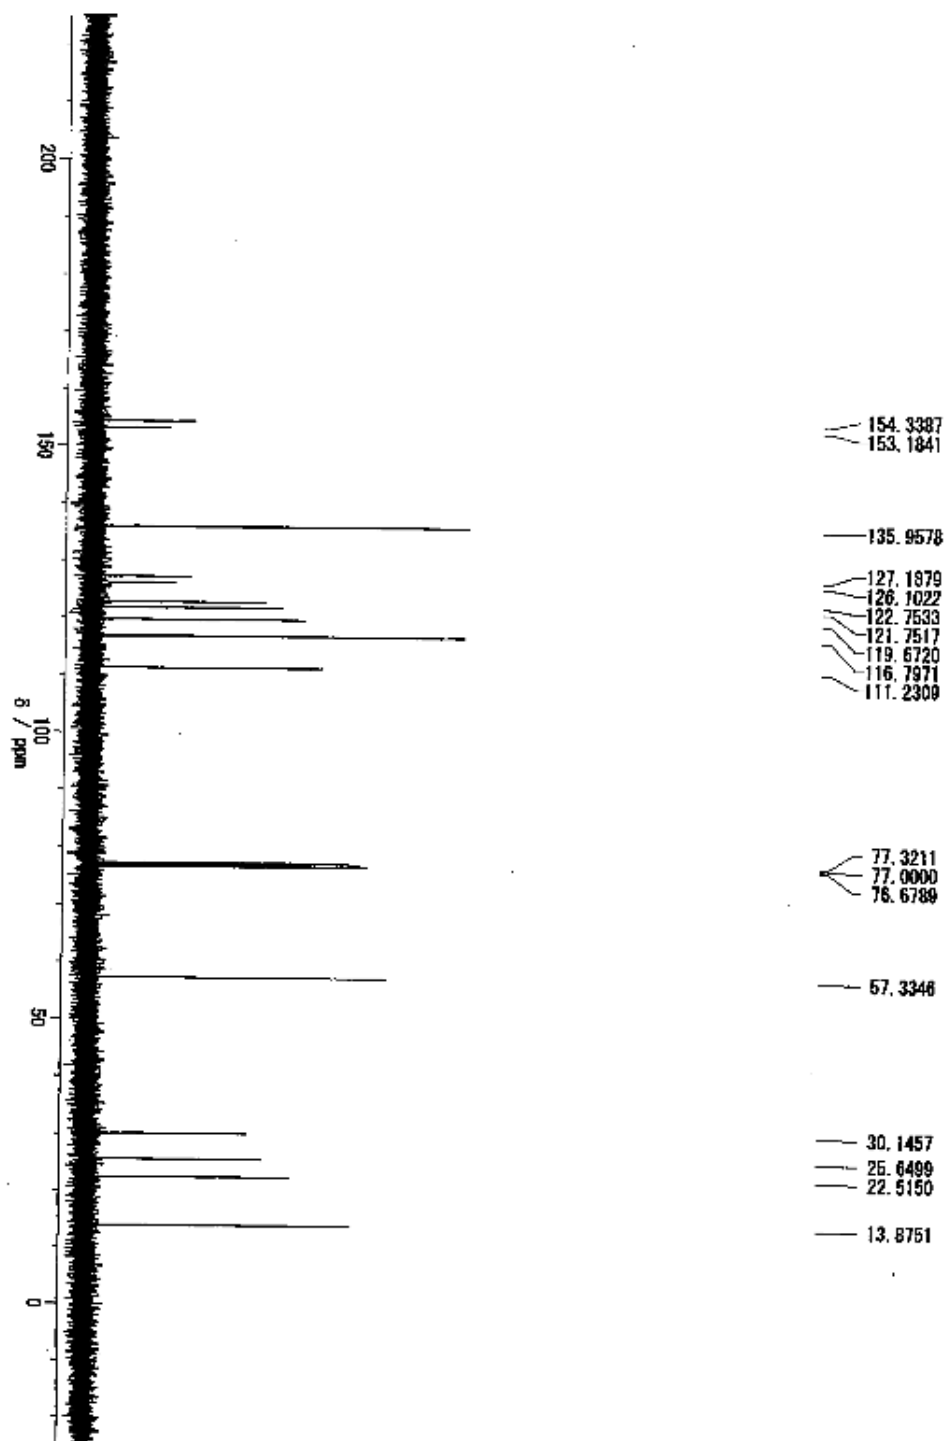

[ $^1\text{H}$  and  $^{13}\text{C}$  NMR spectra of **3gc**]

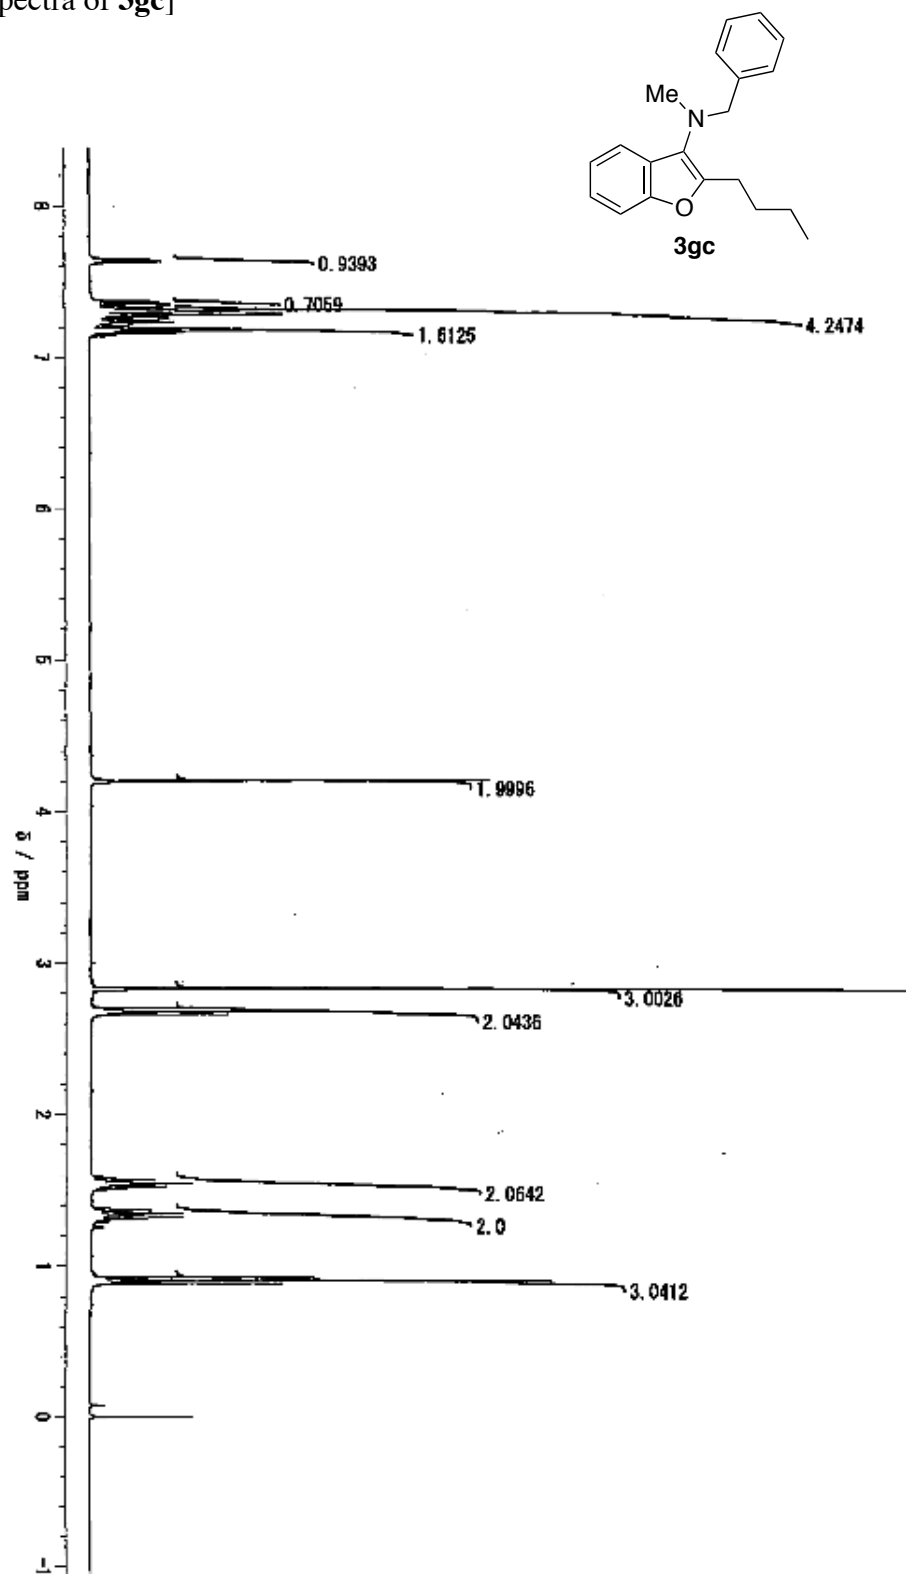



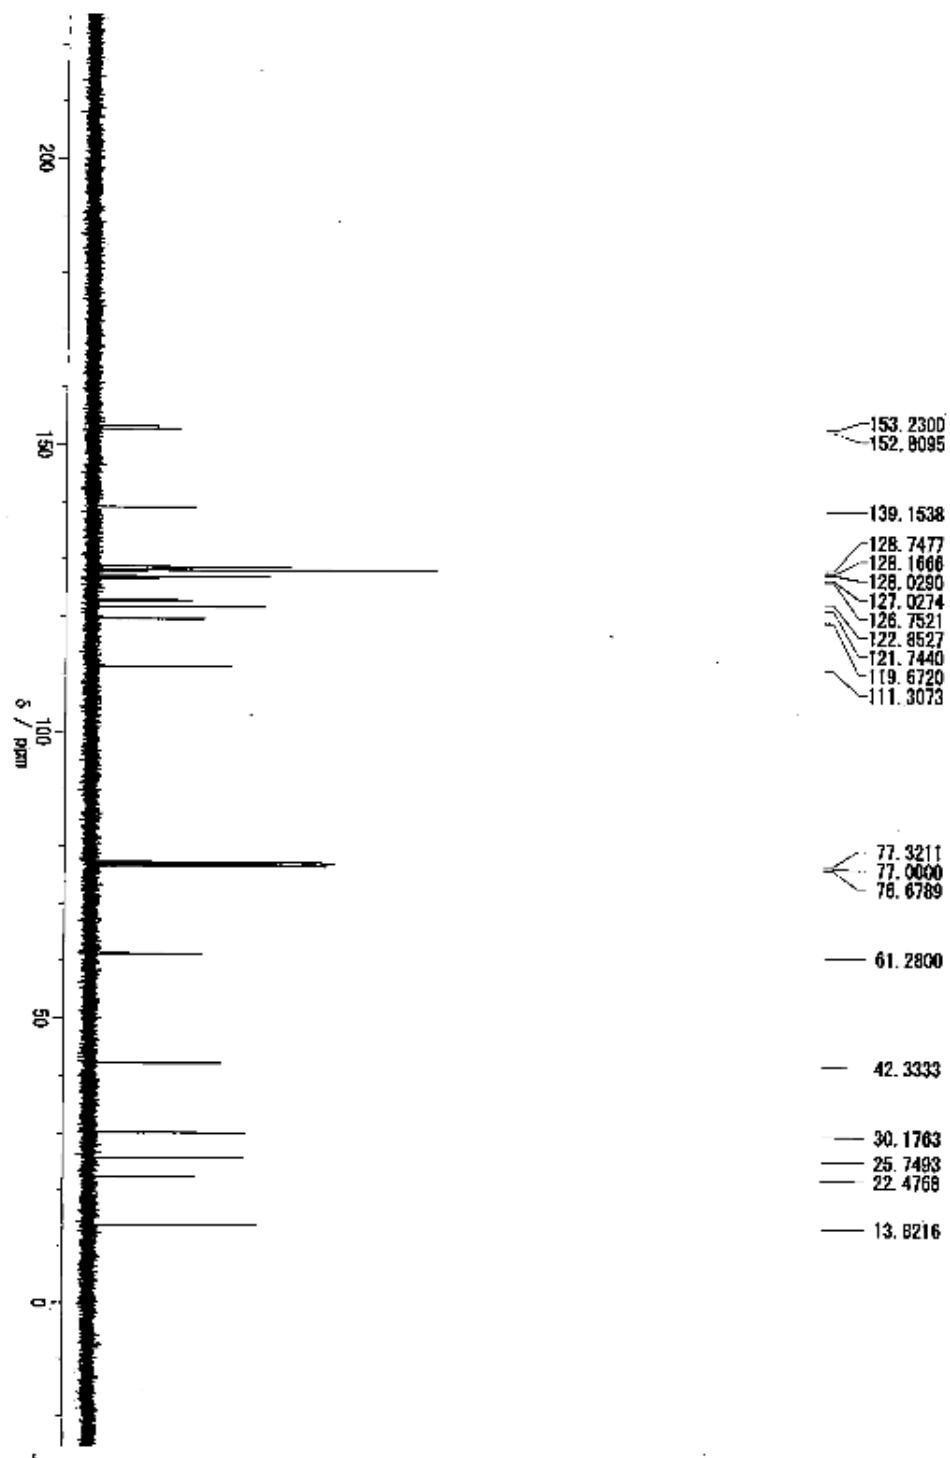

[ $^1\text{H}$  and  $^{13}\text{C}$  NMR spectra of **3gd**]

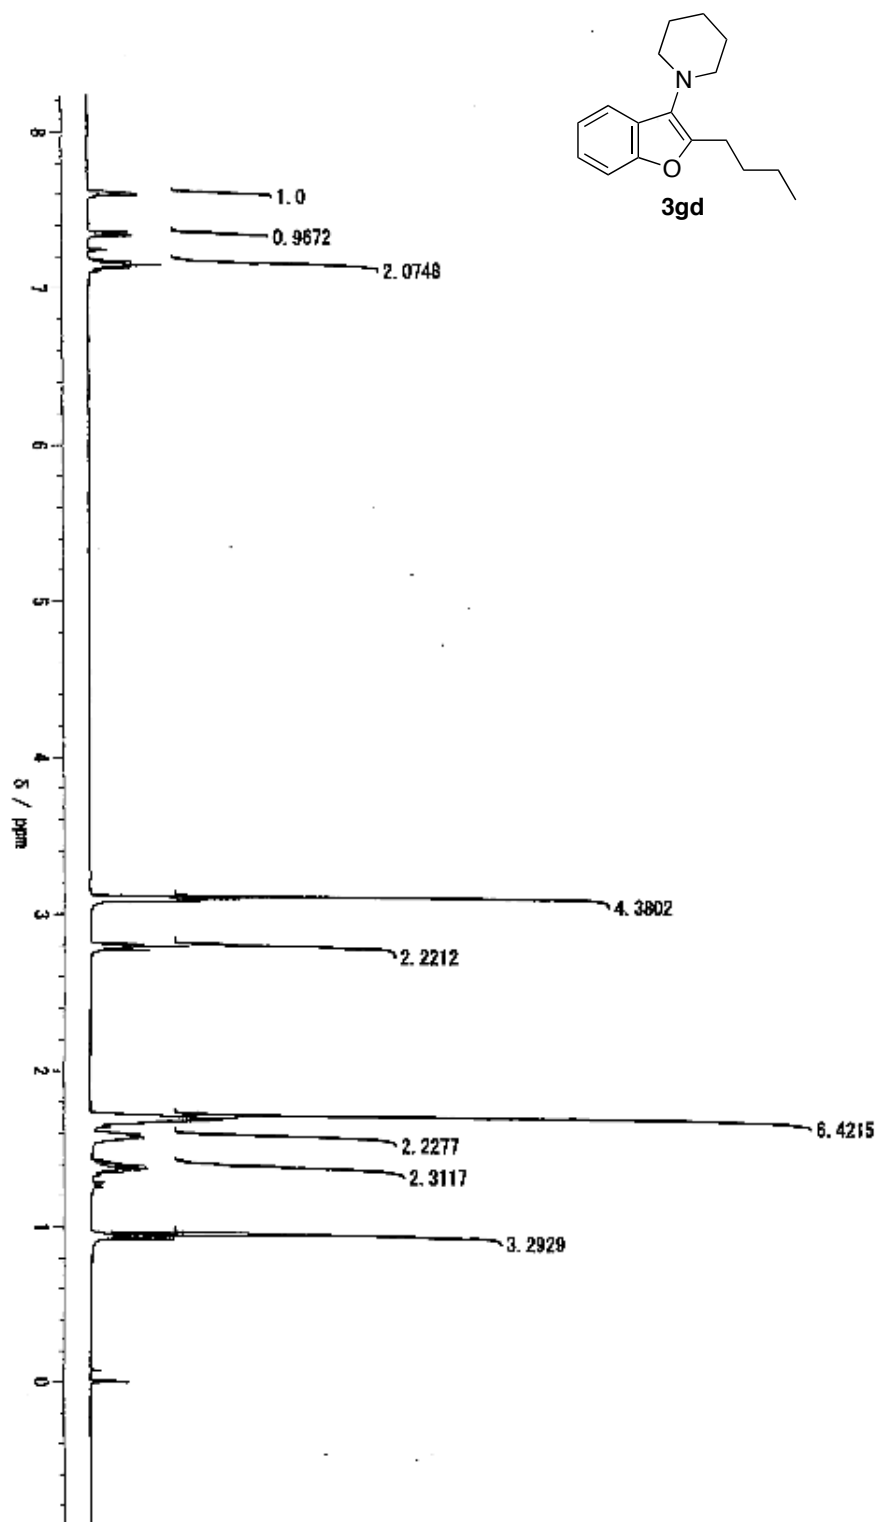

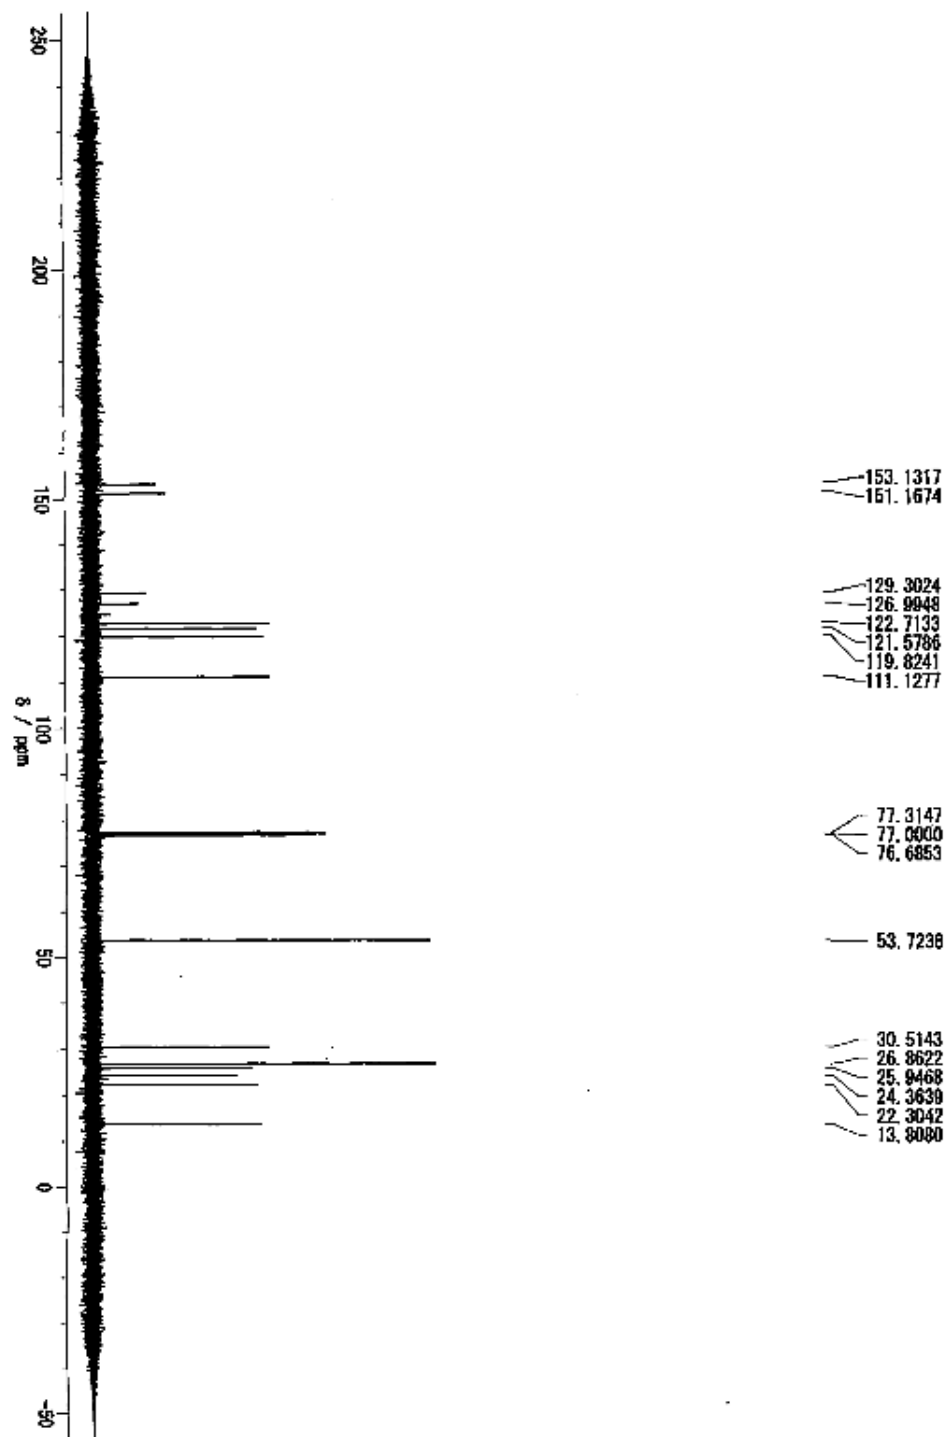

[ $^1\text{H}$  and  $^{13}\text{C}$  NMR spectra of **3ge**]

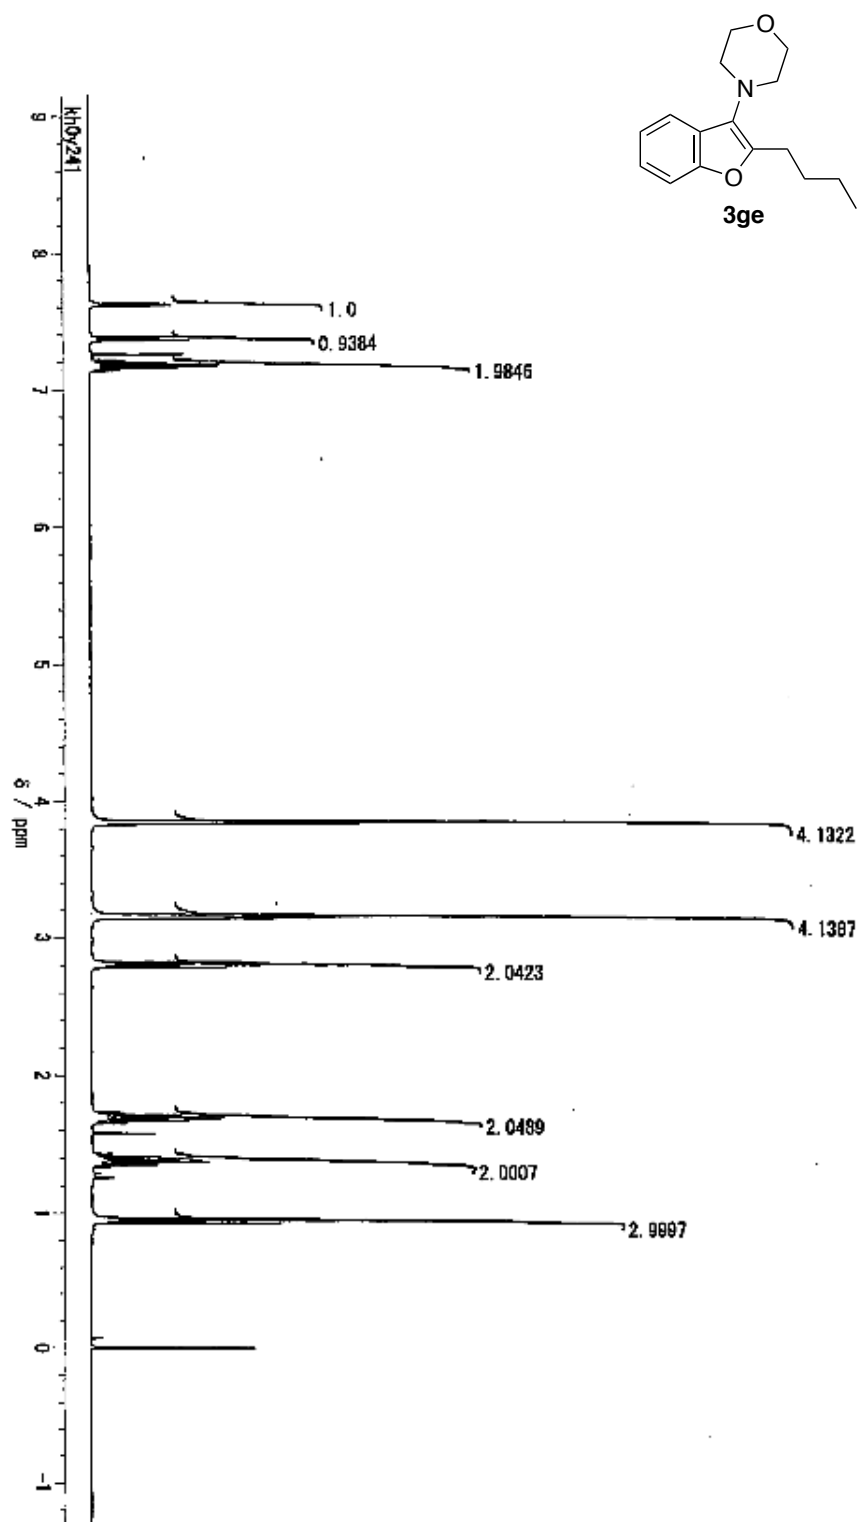

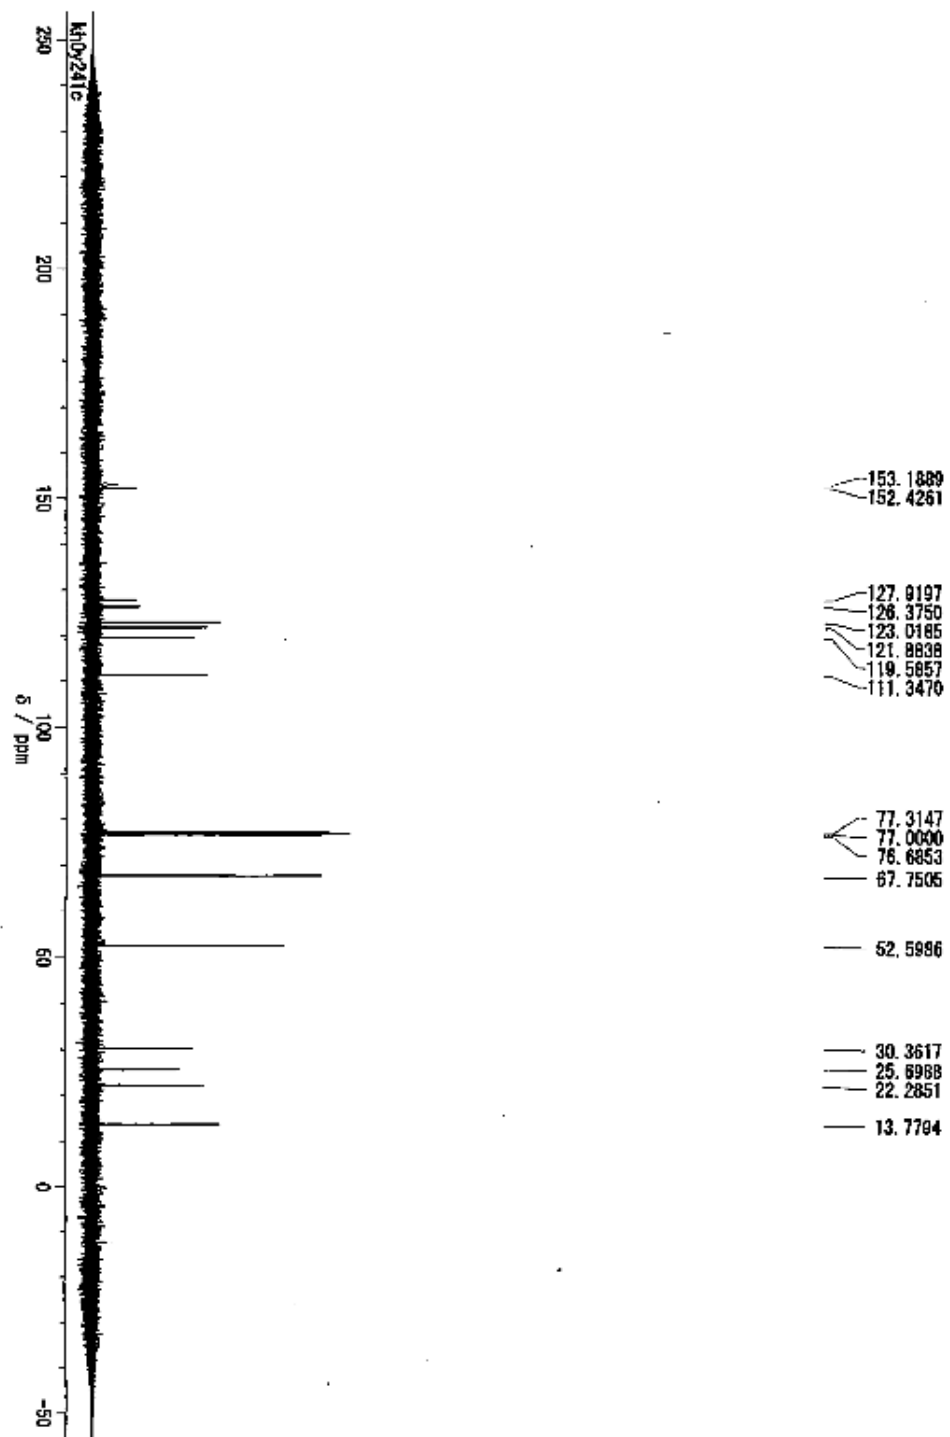

[ $^1\text{H}$  and  $^{13}\text{C}$  NMR spectra of **3gf**]

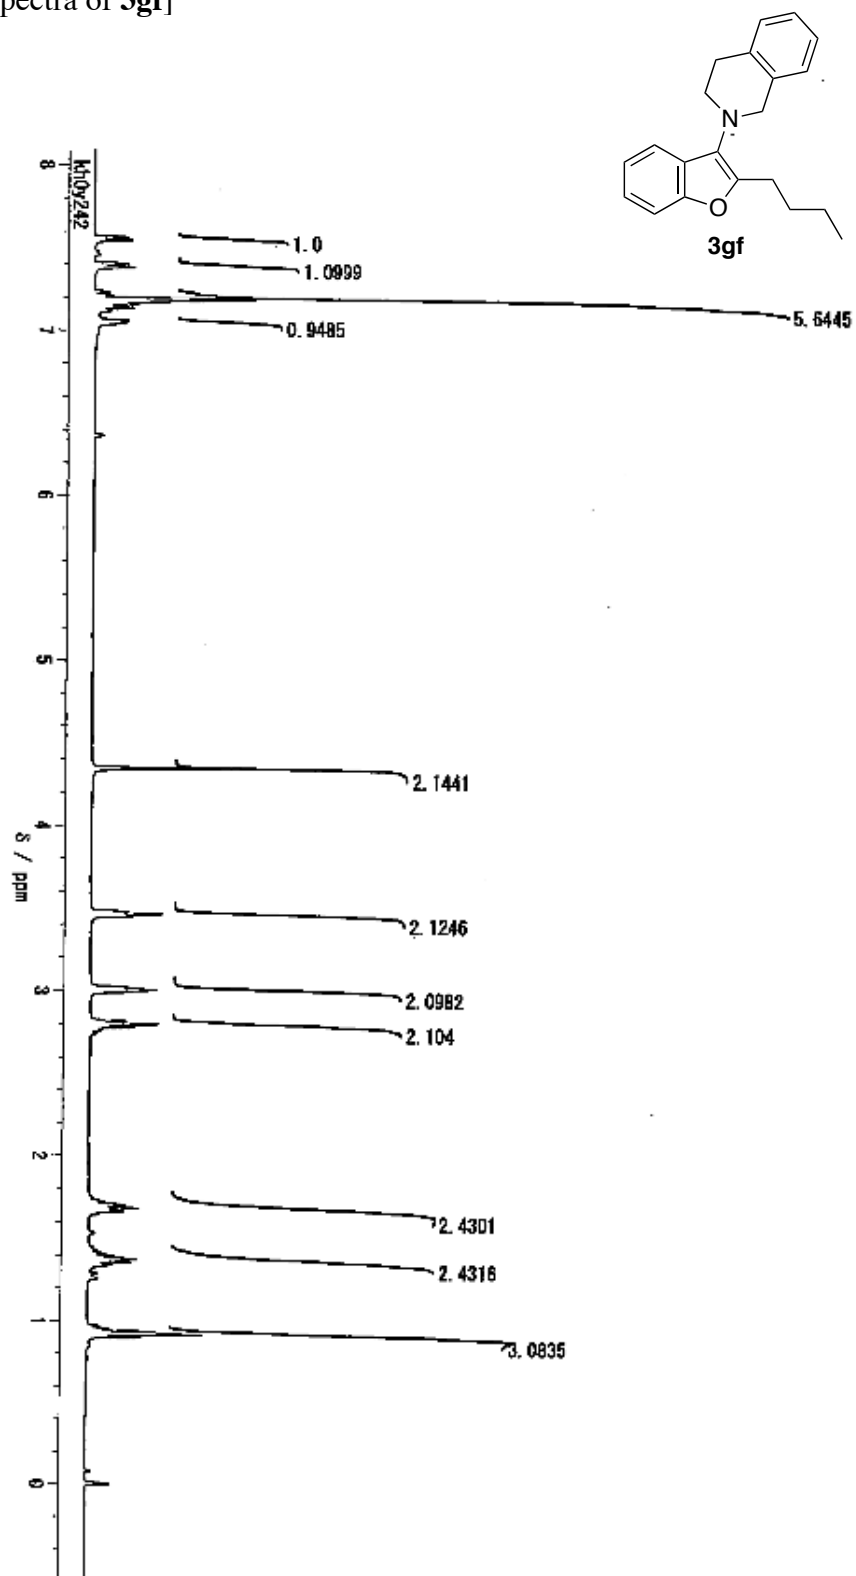

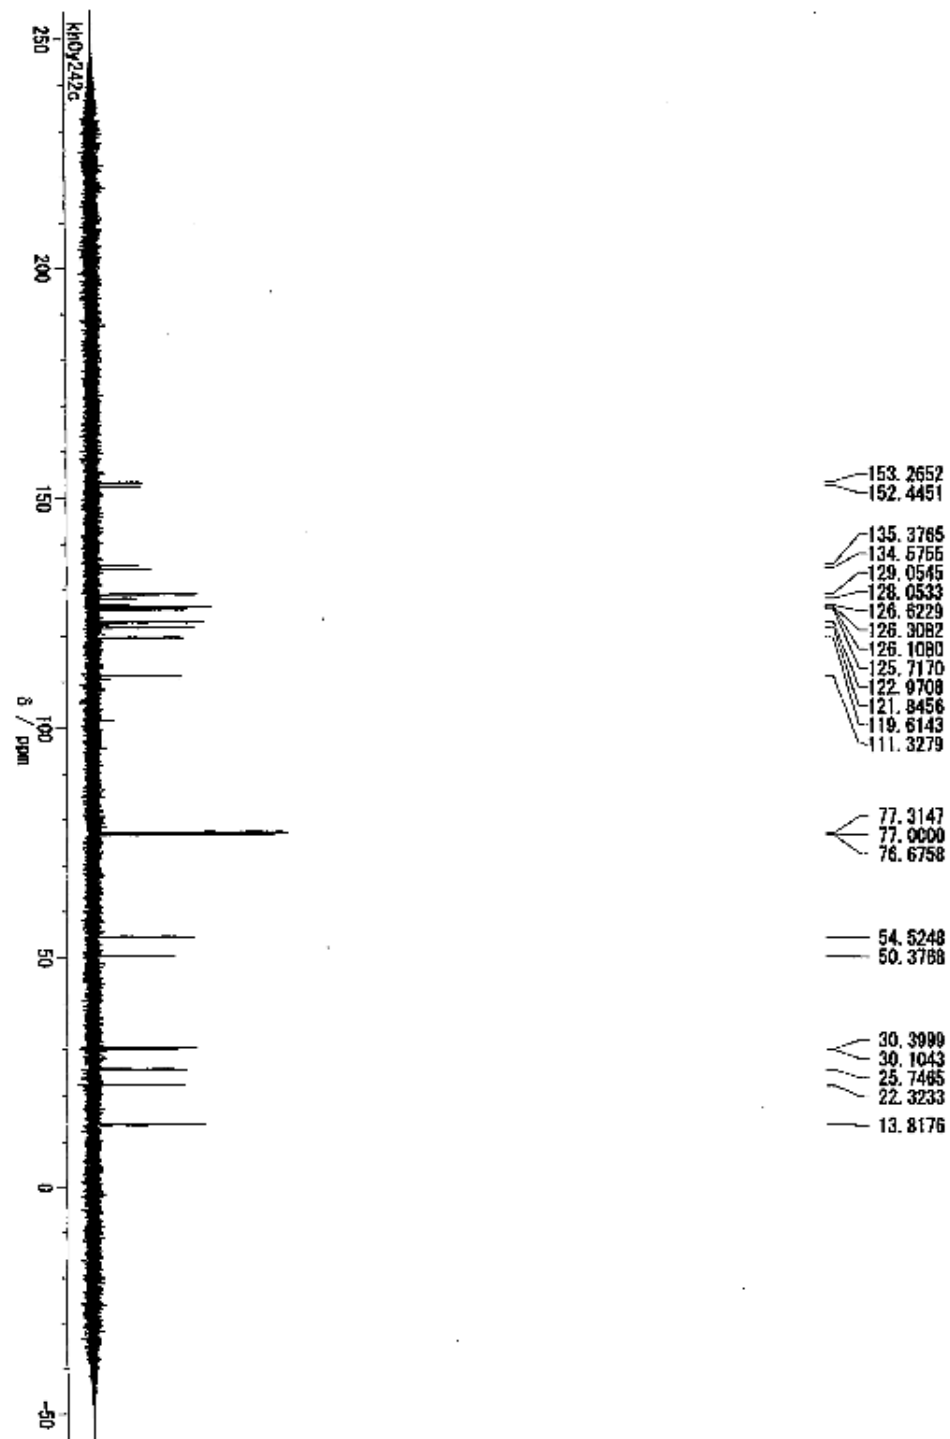

[ $^1\text{H}$  and  $^{13}\text{C}$  NMR spectra of **3lg**]

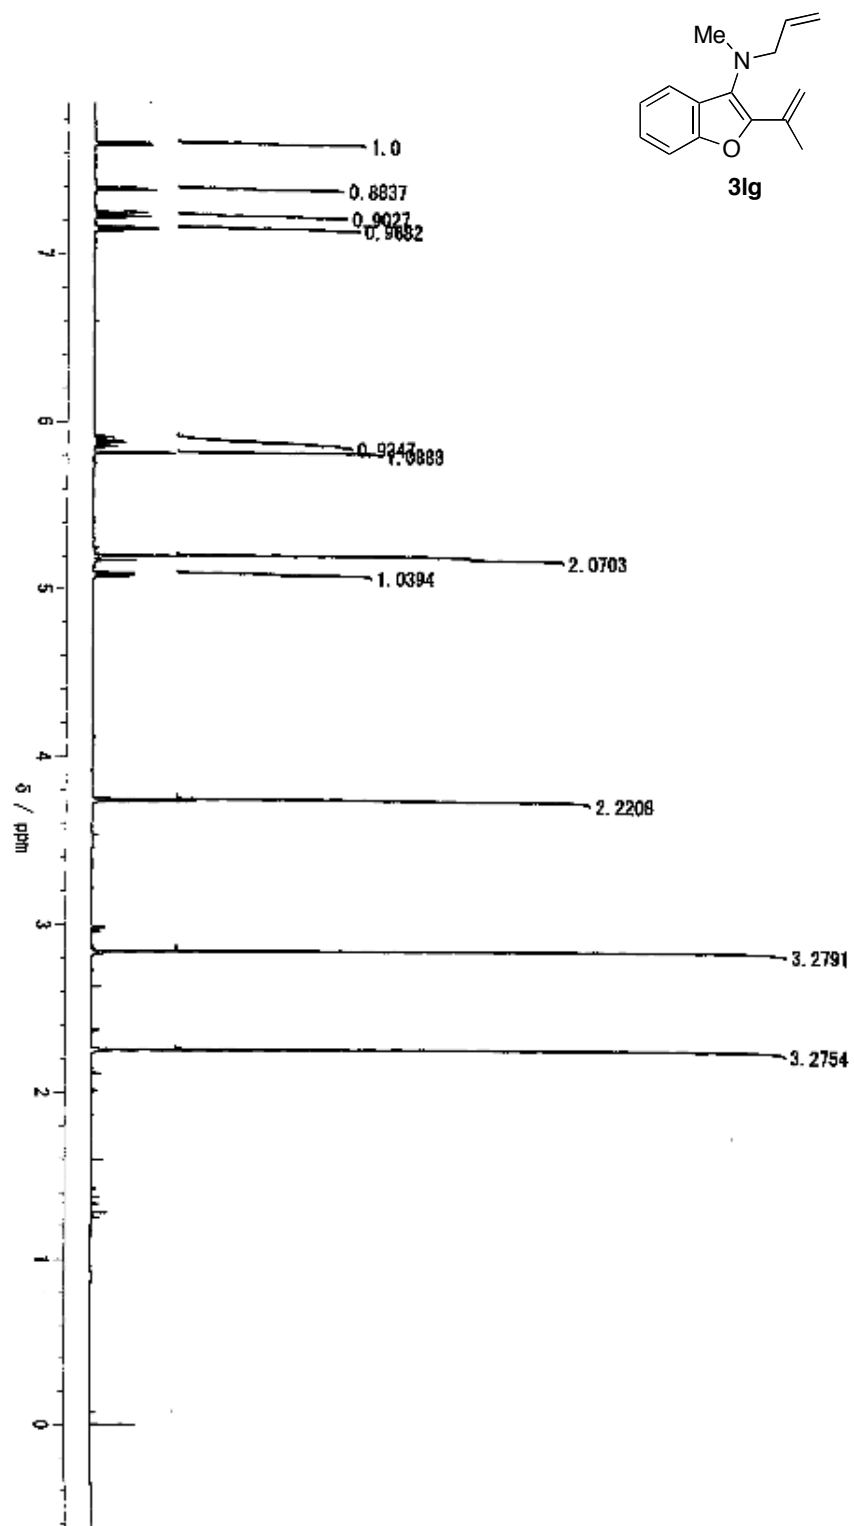



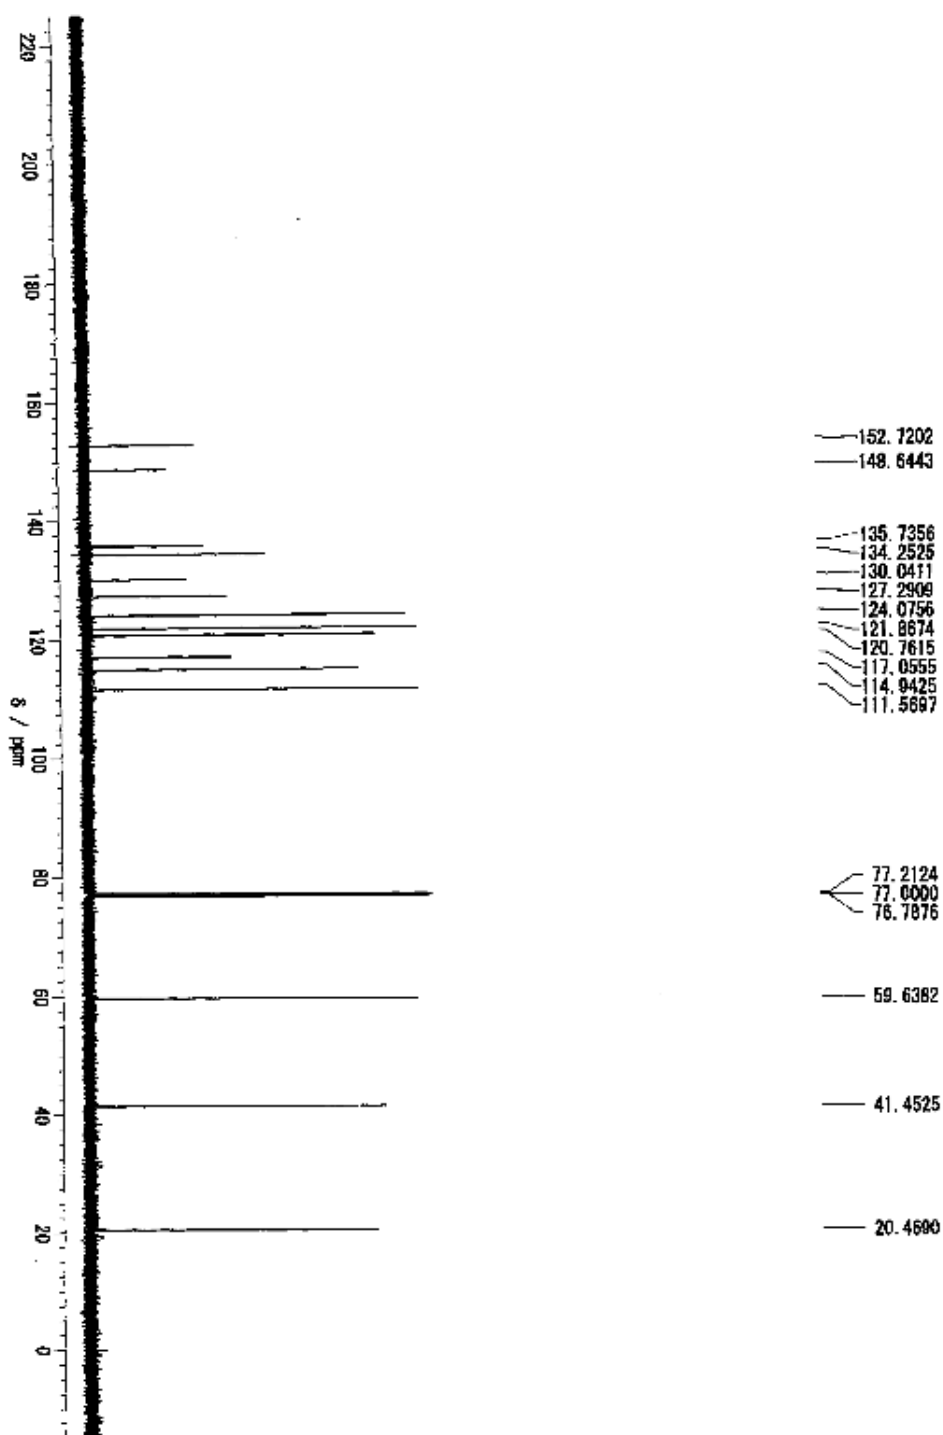

[ $^1\text{H}$  and  $^{13}\text{C}$  NMR spectra of **4**]

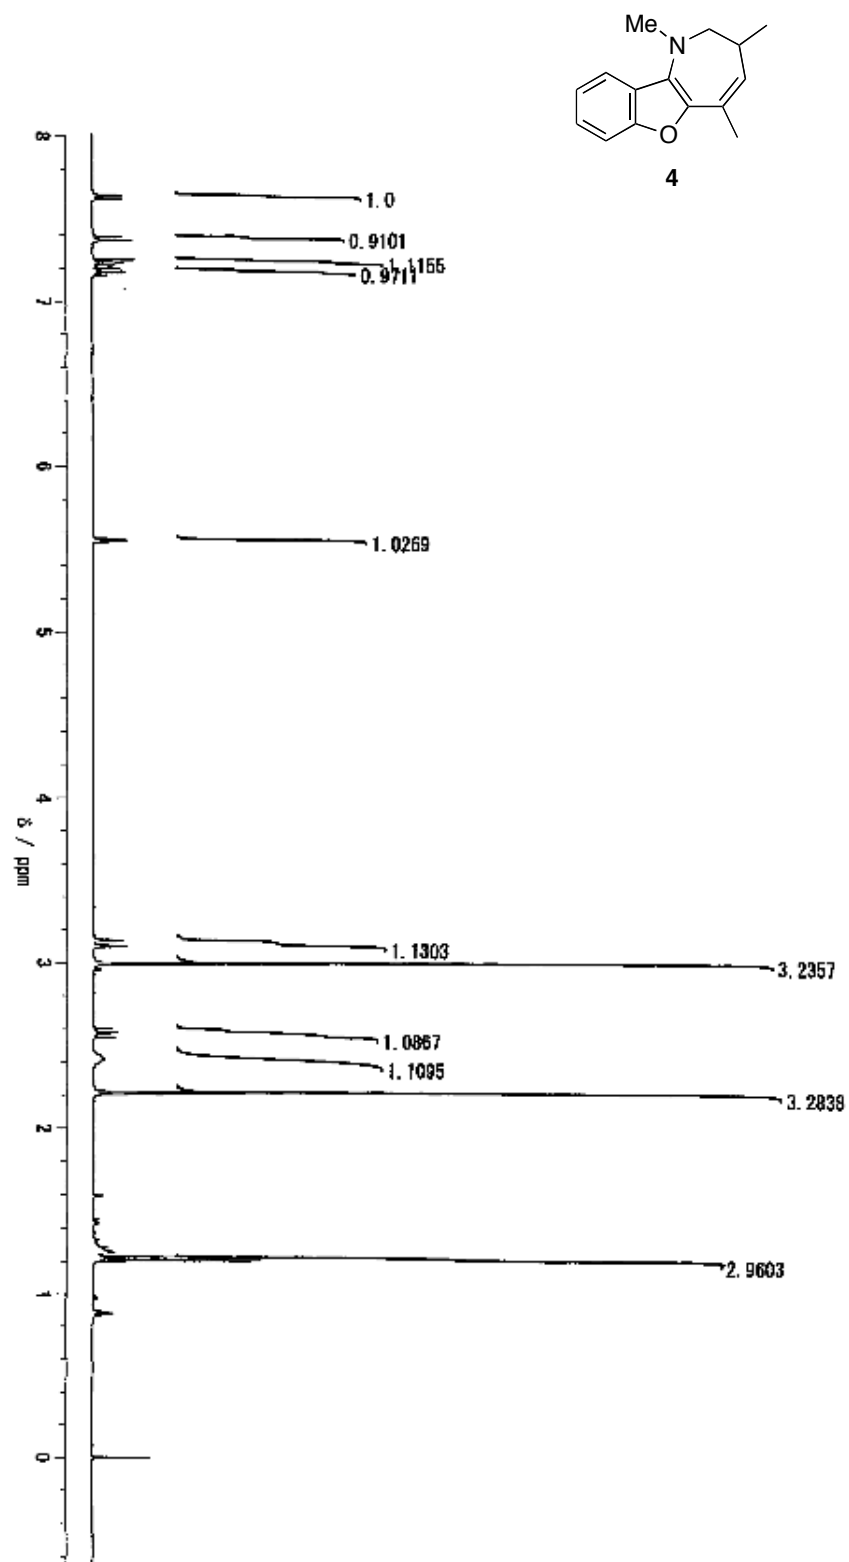

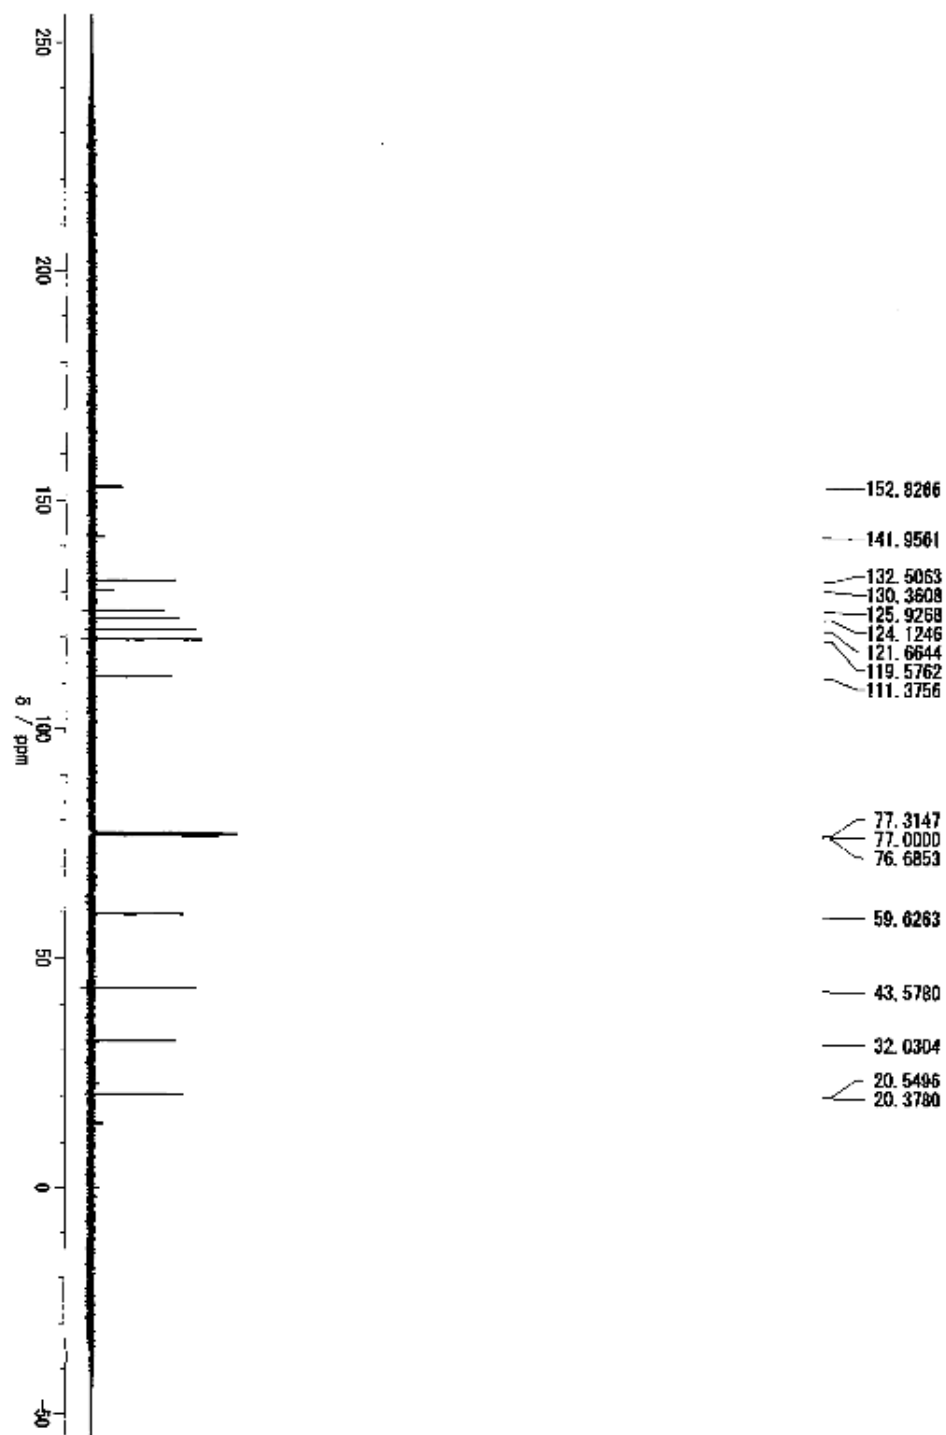

Supplement: Supplementary file 1 [file 4313767]
